# Supplementary material for: Sensitive and rapid oxygen isotopic analysis of nephrite jade using large-geometry SIMS
Source: Royal Society of Chemistry journal article supplement (doi:10.1039/c8ja00424b), 2019-01-01
Supplement: c8ja00424b1.pdf [file c8ja00424b1.pdf]

## **Electronic supplementary information**

Supplementary Table 1: Electron microprobe (EMPA) data for nephrite from Siberia.

Supplementary Table 2: Secondary ionization mass spectrometry (SIMS) data for nephrite from Siberia. Individual analyses for five analysis sessions are shown along with average values used in Table 2.
