# Supplementary material for: Sensitive and rapid oxygen isotopic analysis of nephrite jade using large-geometry SIMS
Source: Royal Society of Chemistry journal article supplement (doi:10.1039/c8ja00424b), 2019-01-01
Supplement: c8ja00424b2.xlsx [file c8ja00424b2.xlsx]

## Sheet: Tabelle1
Supplementary Table 1: Electron microprobe (EMPA) data for nephrite from Siberia (all values in wt.%)
Sample	Spot	remark	SiO2	TiO2	Al2O3	Cr2O3	FeO	MnO	MgO	CaO	Na2O	K2O	Total
BKL-AKZH-02	1	tremolite-actinolite	56.883	0.027	0.327	0.046	6.172	0.244	20.671	13.137	0.03	0.002	97.539
BKL-AKZH-02	2	tremolite-actinolite	56.796	0.01	0.358	0.046	6.169	0.246	20.833	13.021	-	0.001	97.48
BKL-AKZH-02	3	tremolite-actinolite	56.39	0.05	0.466	0.031	6.038	0.254	20.707	13.153	-	0.005	97.094
BKL-AKZH-03	1	tremolite-actinolite	57.173	0.012	0.584	0.194	3.39	0.083	21.642	13.624	0.093	0.02	96.815
BKL-AKZH-03	2	tremolite-actinolite	56.793	0.013	0.732	0.223	3.965	0.089	21.604	13.293	0.075	0.09	96.877
BKL-AKZH-03	3	tremolite-actinolite	56.592	0.023	0.756	0.18	3.607	0.162	21.623	13.36	0.096	0.086	96.485
BKL-AKZH-04	1	tremolite-actinolite	56.99	0.021	0.365	0.132	3.502	0.255	21.941	13.239	0.07	0.026	96.541
BKL-AKZH-04	2	tremolite-actinolite	57.102	-	0.39	0.097	3.511	0.209	21.901	13.056	0.033	0.01	96.309
BKL-AKZH-04	3	tremolite-actinolite	56.486	0.016	0.754	0.157	3.532	0.268	22.109	13.357	0.048	-	96.727
BKL-AKZH-05	1	tremolite-actinolite	56.722	0.026	0.446	0.183	4.105	0.095	21.552	13.79	0.033	0.024	96.976
BKL-AKZH-05	2	tremolite-actinolite	56.888	-	0.599	0.12	4.246	0.11	21.329	13.329	0.092	0.023	96.736
BKL-AKZH-05	3	tremolite-actinolite	57.367	-	0.466	0.145	4.191	0.106	21.759	13.417	0.036	0.023	97.51
BKL-AKZH-06	1	tremolite-actinolite	54.41	-	1.735	0.351	5.581	0.206	21.275	12.155	0.063	0.016	95.792
BKL-AKZH-06	2	tremolite-actinolite	56.304	0.069	0.53	0.181	6.832	0.168	20.193	12.937	0.06	0.024	97.298
BKL-AKZH-06	3	tremolite-actinolite	56.703	-	0.403	0.176	4.642	0.195	21.275	13.253	0.035	0.044	96.726
BKL-BALD-01	1	tremolite-actinolite	56.767	0.015	0.488	0.007	3.298	0.121	22.498	13.133	0.046	0.185	96.558
BKL-BALD-01	2	tremolite-actinolite	56.981	-	0.358	0.055	3.363	0.148	22.241	13.329	0.074	0.075	96.624
BKL-BALD-01	3	tremolite-actinolite	56.651	-	0.383	0.071	3.367	0.176	22.112	13.333	0.061	0.117	96.271
BKL-BALD-02	1	tremolite-actinolite	56.747	0.038	0.447	0.117	4.829	0.092	21.325	13.451	0.055	0.055	97.156
BKL-BALD-02	2	tremolite-actinolite	57.131	0.052	0.373	0.123	4.467	0.103	21.615	13.204	0.074	0.046	97.188
BKL-BALD-02	3	tremolite-actinolite	56.905	-	0.314	-	3.951	0.085	21.766	13.43	0.032	0.012	96.495
BKL-BALD-03	1	tremolite-actinolite	57.034	0.005	0.303	0.184	3.966	0.083	21.778	13.643	0.038	0.023	97.057
BKL-BALD-03	2	tremolite-actinolite	57.072	-	0.334	0.152	3.926	0.086	21.845	13.88	0.007	0.043	97.345
BKL-BALD-03	3	tremolite-actinolite	56.826	0.01	0.298	0.146	4.045	0.061	21.879	13.661	0.066	0.004	96.996
BKL-BALD-04	1	tremolite-actinolite	57.417	0.059	0.4	-	4.789	0.15	21.532	13.405	0.043	0.057	97.852
BKL-BALD-04	2	tremolite-actinolite	57.66	-	0.282	0.044	4.827	0.134	21.665	13.313	0.068	0.043	98.036
BKL-BALD-04	3	tremolite-actinolite	57.732	-	0.381	0.028	4.173	0.089	22.106	13.403	0.029	0.05	97.991
BKL-BOR-01	1	tremolite-actinolite	57.053	-	0.281	-	3.262	0.006	22.4	13.832	0.06	-	96.894
BKL-BOR-01	2	tremolite-actinolite	57.201	-	0.246	-	3.112	0.077	22.383	13.512	0.023	0.031	96.585
BKL-BOR-01	3	tremolite-actinolite	56.802	0.034	0.218	0.015	3.113	-	22.086	13.686	0.012	0.017	95.983
BKL-BOR-03	1	tremolite-actinolite	57.712	0.028	0.363	0.076	3.245	-	22.289	13.539	0.088	0.012	97.352
BKL-BOR-03	2	tremolite-actinolite	57.934	-	0.224	0.01	3.263	0.034	22.492	13.419	0.046	0.017	97.439
BKL-BOR-03	3	tremolite-actinolite	57.615	0.01	0.244	0.048	3.211	0.032	22.271	13.736	-	0.027	97.194
BKL-GG-01	1	epidote	37.318	0.04	27.456	-	7.372	0.089	0.28	23.559	0.012	-	96.126
BKL-GG-01	2	epidote	37.626	0.068	27.628	-	7.3	0.137	0.417	23.619	0.047	0.007	96.849
BKL-GG-01	3	titanite	28.34	42.38	1.355	-	0.783	0.052	0.018	27.341	-	0.003	100.272
BKL-GG-01	4	tremolite-actinolite	56.202	-	0.893	0.004	1.362	0.192	23.514	12.799	0.075	0.037	95.078
BKL-GG-01	5	tremolite-actinolite	56.508	0.055	1.181	0.008	1.485	0.198	23.168	12.572	0.106	0.059	95.34
BKL-GG-01	6	tremolite-actinolite	56.73	0.105	1.073	0.058	1.348	0.212	23.281	12.623	0.121	0.032	95.583
BKL-GG-02	1	tremolite-actinolite	55.482	-	0.423	-	9.455	0.096	18.263	13.103	0.027	0.017	96.866
BKL-GG-02	2	tremolite-actinolite	54.966	-	0.724	0.077	9.649	0.068	17.811	13.138	0.063	0.025	96.521
BKL-GG-02	3	tremolite-actinolite	54.657	-	0.532	0.114	10.543	0.083	17.596	13.065	0.064	0.038	96.692
BKL-GG-02	4	chlorite	29.717	-	19.173	1.237	8.508	0.179	26.635	0.427	0.012	0.007	85.895
BKL-GG-02	5	chlorite	30	0.057	17.47	2.127	8.501	0.179	26.917	0.511	0.025	0.02	85.807
BKL-GG-02	6	chlorite	28.461	0.03	20.278	1.214	8.826	0.241	26.362	0.157	0.003	-	85.572
BKL-GG-02	7	tremolite-actinolite	56.791	0.06	0.7	0.19	3.322	0.112	21.849	13.418	0.066	0.026	96.534
BKL-GG-02	8	tremolite-actinolite	56.025	0.001	0.562	0.22	4.718	0.115	21.051	13.067	0.092	0.053	95.904
BKL-GG-02	9	tremolite-actinolite	56.077	0.074	0.837	0.235	3.245	0.086	21.593	13.072	0.096	0.054	95.369
BKL-GG-03	1	tremolite-actinolite	56.452	-	0.376	0.044	2.908	0.205	22.5	13.025	0.076	0.053	95.639
BKL-GG-03	2	tremolite-actinolite	56.264	0.013	0.403	0.058	2.851	0.205	22.298	12.786	0.089	0.072	95.039
BKL-GG-03	3	tremolite-actinolite	56.654	0.022	0.406	0.051	3.133	0.207	22.067	12.989	0.111	0.067	95.707
BKL-GG-04	1	tremolite-actinolite	55.881	0.03	0.455	0.043	3.192	0.133	22.128	12.883	0.044	0.003	94.792
BKL-GG-04	2	tremolite-actinolite	55.983	-	0.6	0.026	3.155	0.109	22.227	12.872	0.043	0.039	95.054
BKL-GG-04	3	tremolite-actinolite	56.46	-	0.324	0.079	3.234	0.159	22.205	12.967	0.061	0.035	95.524
BKL-GG-04	4	tremolite-actinolite	56.509	0.048	0.409	0.01	3.346	0.114	22.215	13.041	0.053	0.026	95.771
BKL-GG-05	1	tremolite-actinolite	57.961	-	0.29	0.05	2.293	0.12	22.997	12.906	0.057	-	96.674
BKL-GG-05	2	tremolite-actinolite	57.484	0.003	0.287	0.099	2.369	0.058	22.796	12.991	0.034	0.003	96.124
BKL-GG-05	3	tremolite-actinolite	56.726	0.036	0.404	-	2.548	0.092	22.75	12.887	0.052	0.02	95.515
BKL-GG-05	4	tremolite-actinolite	56.71	0.033	0.407	0.041	2.531	0.11	22.769	12.955	0.037	0.05	95.643
BKL-GG-05	5	chlorite	30.809	-	17.386	0.495	6.544	0.141	29.476	0.134	0.025	0.014	85.024
BKL-GG-05	6	chlorite	30.954	-	18.056	0.763	6.051	0.171	29.205	0.108	-	0.026	85.334
BKL-GG-05	7	chlorite	31.32	-	17.627	0.19	6.435	0.149	29.607	0.116	0.032	0.494	85.97
BKL-GG-06	1	tremolite-actinolite	57.158	-	0.15	0.092	3.68	0.03	22.208	13.337	0.05	0.036	96.741
BKL-GG-06	2	tremolite-actinolite	56.896	-	0.39	0.184	3.789	0.041	22.227	13.383	0.017	0.043	96.97
BKL-GG-06	3	tremolite-actinolite	57.107	0.025	0.157	0.094	3.899	0.036	21.951	13.255	0.035	0.045	96.604
BKL-GG-07	1	tremolite-actinolite	57.952	0.019	0.184	0.074	4.069	0.082	22.354	13.169	0.032	0.03	97.965
BKL-GG-07	2	tremolite-actinolite	57.466	0.04	0.197	0.135	4.766	0.057	22.011	13.248	0.032	0.005	97.957
BKL-GG-07	3	tremolite-actinolite	57.784	0.069	0.254	0.08	4.222	0.032	22.378	13.347	0.031	0.037	98.234
BKL-GG-08	1	tremolite-actinolite	56.807	-	0.853	0.22	3.313	0.094	22.221	13.418	0.068	0.169	97.163
BKL-GG-08	2	tremolite-actinolite	56.705	-	0.716	0.309	3.645	0.122	21.865	13.288	0.101	0.051	96.802
BKL-GG-08	3	tremolite-actinolite	56.889	0.013	0.888	0.319	3.438	0.089	22.044	13.354	0.05	0.095	97.179
BKL-GG-10	1	tremolite-actinolite	57.188	-	0.43	0.092	2.812	0.122	22.778	13.154	0.053	0.036	96.665
BKL-GG-10	2	tremolite-actinolite	57.508	-	0.691	0.174	3.06	0.069	22.565	12.804	0.113	0.111	97.095
BKL-GG-10	3	tremolite-actinolite	57.092	0.041	0.584	0.099	3.214	0.101	22.396	13.393	0.094	0.046	97.06
BKL-GG-12	1	tremolite-actinolite	56.754	0.033	0.593	0.093	4.791	0.138	20.932	13.38	0.188	0.111	97.013
BKL-GG-12	2	tremolite-actinolite	55.979	0.003	0.977	0.122	5.25	0.16	20.867	13.026	0.192	0.32	96.896
BKL-GG-12	3	tremolite-actinolite	56.611	0.026	0.704	0.074	5.292	0.169	20.727	13.244	0.175	0.078	97.1
BKL-GG-14	1	tremolite-actinolite	57.525	0.013	0.336	0.144	3.282	0.085	22.226	13.191	0.114	0.07	96.986
BKL-GG-14	2	tremolite-actinolite	57.654	0.006	0.223	0.142	3.035	0.078	22.484	13.576	0.06	0.049	97.307
BKL-GG-14	3	tremolite-actinolite	57.557	0.057	0.22	0.215	3.18	0.072	22.353	13.368	0.131	0.058	97.211
BKL-GG-16	1	tremolite-actinolite	56.069	0.016	0.703	0.227	3.52	0.085	21.646	13.171	0.175	0.145	95.757
BKL-GG-16	2	tremolite-actinolite	55.476	0.012	0.728	0.155	3.527	0.104	21.678	13.028	0.17	0.169	95.047
BKL-GG-16	3	tremolite-actinolite	56.237	0.018	0.53	0.093	3.574	0.103	21.811	13.214	0.11	0.058	95.748
BKL-GG-21	1	tremolite-actinolite	56.972	0.01	0.679	0.169	3.735	0.081	22.567	13.012	0.109	0.024	97.358
BKL-GG-21	2	tremolite-actinolite	57.408	0.032	0.221	0.131	3.729	0.105	22.079	13.677	0.064	0.001	97.447
BKL-GG-21	3	tremolite-actinolite	57.181	-	0.283	0.188	4.328	0.06	21.784	13.189	0.091	0.034	97.138
BKL-GG-22	1	tremolite-actinolite	56.7	0.029	0.655	0.005	4.432	0.71	21.286	13.33	0.105	0.056	97.308
BKL-GG-22	2	tremolite-actinolite	56.786	0.04	0.593	-	4.565	0.637	21.165	13.358	0.056	0.037	97.237
BKL-GG-22	3	tremolite-actinolite	56.638	0.027	0.68	0.041	4.452	0.646	21.193	13.158	0.062	0.063	96.96
BKL-GG-23	1	tremolite-actinolite	55.803	0.025	1.184	0.31	4.894	0.176	20.529	13.555	0.072	0.028	96.576
BKL-GG-23	2	tremolite-actinolite	56.815	0.021	0.481	0.07	4.034	0.154	21.637	13.037	0.065	0.016	96.33
BKL-GG-23	3	tremolite-actinolite	57.417	-	0.721	0.075	4.367	0.131	21.4	13.056	0.093	0.064	97.324
BKL-GOLI-01	1	tremolite-actinolite	56.825	0.003	0.678	0.002	0.317	0.053	23.767	13.135	0.103	0.065	94.948
BKL-GOLI-01	2	tremolite-actinolite	56.726	0.029	0.758	-	0.257	0.079	23.597	14.088	0.093	0.045	95.672
BKL-GOLI-01	3	tremolite-actinolite	56.839	0.021	0.972	-	0.369	0.092	23.601	13.654	0.084	0.062	95.694
BKL-GOLI-02	1	tremolite-actinolite	58.916	0.023	0.436	-	0.056	0.003	25.03	12.669	0.1	0.07	97.303
BKL-GOLI-02	2	tremolite-actinolite	58.774	0.005	0.357	-	0.044	0.006	24.801	13.558	0.1	0.047	97.692
BKL-GOLI-02	3	tremolite-actinolite	58.995	-	0.464	-	0.03	0.015	24.897	12.929	0.099	0.09	97.519
BKL-KAV-01	1	tremolite-actinolite	57.584	-	0.47	-	0.062	-	24.487	13.377	0.072	0.045	96.097
BKL-KAV-01	2	tremolite-actinolite	57.21	0.057	0.658	0.012	0.032	0.056	24.185	13.315	0.093	0.028	95.646
BKL-KAV-01	3	tremolite-actinolite	56.911	0.014	0.607	0.023	0.003	0.026	24.556	12.738	0.102	0.056	95.036
BKL-KAV-02	1	tremolite-actinolite	58.331	-	0.501	-	0.052	0.021	24.885	13.117	0.138	0.052	97.097
BKL-KAV-02	2	tremolite-actinolite	58.663	-	0.473	0.013	0.083	0.015	24.755	13.243	0.112	0.115	97.472
BKL-KAV-02	3	tremolite-actinolite	58.281	0.019	0.505	-	0.105	0.041	24.926	13.022	0.122	0.095	97.116
BKL-KHAI-01	1	tremolite-actinolite	57.486	0.035	0.537	-	0.261	0.094	24.119	13.357	0.144	0.072	96.105
BKL-KHAI-01	2	tremolite-actinolite	57.174	-	0.574	-	0.31	0.099	24.331	13.398	0.079	0.049	96.014
BKL-KHAI-01	3	tremolite-actinolite	57.339	0.066	0.512	0.053	0.248	0.114	24.102	13.319	0.1	0.053	95.906
BKL-KHAI-01	4	tremolite-actinolite	56.805	0.025	0.645	-	0.304	0.069	23.889	13.626	0.153	0.066	95.582
BKL-KHAI-02	1	tremolite-actinolite	58.174	0.012	0.337	-	0.418	0.111	24.344	13.572	0.137	0.089	97.194
BKL-KHAI-02	2	tremolite-actinolite	58.202	-	0.79	0.007	0.471	0.101	24.822	12.34	0.142	0.265	97.14
BKL-KHAI-02	3	tremolite-actinolite	58.19	-	0.288	0.033	0.413	0.134	24.337	13.664	0.159	0.092	97.31
BKL-KHAM-01	1	tremolite-actinolite	55.547	0.031	1.373	0.396	4.249	0.061	21.349	13.476	0.117	0.019	96.618
BKL-KHAM-01	2	tremolite-actinolite	55.942	-	1.137	0.475	4.031	0.062	21.248	13.411	0.104	0.025	96.435
BKL-KHAM-01	3	tremolite-actinolite	56.634	-	0.85	0.312	4.014	0.094	21.443	13.667	0.068	0.006	97.088
BKL-KHAM-02	1	tremolite-actinolite	56.295	0.004	0.353	0.273	4.001	0.124	21.406	13.373	0.047	0.015	95.891
BKL-KHAM-02	2	tremolite-actinolite	56.479	0.018	0.372	0.232	3.991	0.096	21.569	13.46	0.07	0.034	96.321
BKL-KHAM-02	3	tremolite-actinolite	56.478	-	0.298	0.148	3.828	0.071	21.713	13.447	0.01	-	95.993
BKL-KHAM-03	1	tremolite-actinolite	56.95	-	0.579	0.26	3.858	0.038	21.781	13.511	0.083	0.033	97.093
BKL-KHAM-03	2	tremolite-actinolite	56.787	0.018	0.506	0.171	3.615	0.098	21.829	13.475	0.059	-	96.558
BKL-KHAM-03	3	tremolite-actinolite	56.525	0.018	0.587	0.305	3.849	0.096	21.693	13.436	0.069	-	96.578
BKL-KHAM-04	1	tremolite-actinolite	55.237	0.066	1.428	0.473	7.208	0.25	19.598	13.424	0.144	0.069	97.897
BKL-KHAM-04	2	tremolite-actinolite	55.697	0.049	1.124	0.268	5.045	0.163	20.465	12.904	0.106	0.09	95.911
BKL-KHAM-04	3	tremolite-actinolite	56.163	0.044	0.978	0.332	5.453	0.23	20.656	12.875	0.095	0.04	96.866
BKL-KHAM-05	1	tremolite-actinolite	56.022	-	1.199	0.295	5.163	0.101	20.634	13.7	0.119	0.043	97.276
BKL-KHAM-05	2	tremolite-actinolite	56.011	0.003	1.234	0.186	4.85	0.178	20.886	13.43	0.12	0.045	96.943
BKL-KHAM-05	3	tremolite-actinolite	56.081	0.025	1.222	0.16	4.9	0.182	20.95	13.254	0.123	0.066	96.963
BKL-KHAM-06	1	tremolite-actinolite	57.22	-	0.376	0.188	4.212	0.146	21.465	13.622	0.076	0.046	97.351
BKL-KHAM-06	2	tremolite-actinolite	57.545	0.022	0.344	0.092	4.128	0.142	21.772	13.45	0.07	0.047	97.612
BKL-KHAM-06	3	tremolite-actinolite	57.372	-	0.335	0.135	4.304	0.163	21.672	13.407	0.07	0.064	97.522
BKL-KHARG-01	1	tremolite-actinolite	56.193	-	0.286	-	4.689	0.201	21.417	13.348	0.041	0.034	96.209
BKL-KHARG-01	2	tremolite-actinolite	56.084	0.034	0.239	0.156	3.424	0.114	22.063	13.218	0.057	0.036	95.425
BKL-KHARG-01	3	tremolite-actinolite	56.234	-	0.14	0.066	4.002	0.161	21.736	13.513	0.032	0.02	95.904
BKL-KHARG-02	1	tremolite-actinolite	56.375	0.024	0.374	0.117	4.319	0.183	21.536	13.114	0.032	0.089	96.163
BKL-KHARG-02	2	tremolite-actinolite	56.343	-	0.373	0.204	3.632	0.162	21.708	13.116	0.053	0.031	95.622
BKL-KHARG-02	3	tremolite-actinolite	55.066	-	1.445	0.298	3.859	0.118	21.816	12.385	0.056	0.591	95.634
BKL-KHOKH-01	1	tremolite-actinolite	57.186	0.093	0.714	0.128	3.969	0.13	22.044	13.131	0.069	0.228	97.692
BKL-KHOKH-01	2	tremolite-actinolite	57.356	0.019	0.26	0.058	4.308	0.081	21.506	13.493	0.072	0.08	97.233
BKL-KHOKH-01	3	tremolite-actinolite	57.403	0.02	0.243	0.107	3.773	0.086	21.948	13.437	0.078	0.017	97.112
BKL-OSP-01	1	tremolite-actinolite	32.955	-	15.869	1.58	7.185	0.171	25.922	2.308	0.04	0.034	86.064
BKL-OSP-01	2	tremolite-actinolite	56.722	-	0.619	0.394	2.991	0.087	22.317	13.212	0.074	0.002	96.418
BKL-OSP-01	3	tremolite-actinolite	56.362	0.027	0.788	0.343	2.925	0.074	22.457	12.989	0.051	0.191	96.207
BKL-OSP-01	4	tremolite-actinolite	56.455	0.024	0.454	0.126	2.716	0.084	22.538	13.451	0.029	0.018	95.895
BKL-OSP-01	5	tremolite-actinolite	57.013	0.033	0.427	0.208	2.786	0.057	22.565	13.325	0.03	0.006	96.45
BKL-OSP-01	6	chlorite	29.495	0.016	20.168	1.293	7.896	0.108	27.541	0.216	0.022	0.003	86.758
BKL-OSP-02	1	tremolite-actinolite	56.878	0.031	0.094	-	2.609	0.09	22.893	13.123	0.042	0.049	95.809
BKL-OSP-02	2	tremolite-actinolite	57.043	0.014	0.091	0.012	2.413	0.043	22.889	13.251	-	0.032	95.788
BKL-OSP-02	3	tremolite-actinolite	56.856	0.014	0.116	-	2.584	0.069	22.713	13.287	0.022	0.031	95.692
BKL-OSP-03	1	tremolite-actinolite	57.635	0.024	0.143	0.01	2.971	0.132	22.785	13.322	0.024	0.025	97.071
BKL-OSP-03	2	tremolite-actinolite	57.395	0.048	0.255	0.043	3.036	0.091	22.808	13.104	0.019	0.027	96.826
BKL-OSP-03	3	tremolite-actinolite	57.574	0.008	0.107	0.048	2.914	0.053	22.856	13.101	0.026	0.027	96.714
BKL-OSP-04	1	tremolite-actinolite	56.846	-	0.541	0.18	4.119	0.278	21.408	13.488	0.084	0.033	96.977
BKL-OSP-04	2	tremolite-actinolite	56.705	0.013	0.592	0.147	4.26	0.3	21.449	13.248	0.11	0.076	96.9
BKL-OSP-04	3	tremolite-actinolite	56.81	-	0.511	0.182	4.242	0.284	21.484	13.38	0.083	0.05	97.026
BKL-OSP-05	1	tremolite-actinolite	57.098	-	0.627	0.109	3.771	0.217	21.762	13.318	0.08	0.03	97.012
BKL-OSP-05	2	tremolite-actinolite	57.089	0.019	0.612	0.234	3.847	0.193	21.664	13.513	0.063	0.036	97.27
BKL-OSP-05	3	tremolite-actinolite	56.64	0.011	0.554	0.188	3.991	0.282	21.42	13.088	0.096	0.015	96.285
BKL-OSP-06	1	tremolite-actinolite	57.042	-	0.584	0.172	3.889	0.158	21.693	13.589	0.113	0.051	97.291
BKL-OSP-06	2	tremolite-actinolite	57.337	0.018	0.426	0.121	3.682	0.133	21.764	13.407	0.079	0.026	96.993
BKL-OSP-06	3	tremolite-actinolite	57.186	0.007	0.4	0.107	3.825	0.11	21.794	13.389	0.044	0.048	96.91
BKL-OSP-07	1	tremolite-actinolite	55.809	0.025	0.479	-	3.081	0.162	22.096	13.558	0.055	-	95.265
BKL-OSP-07	2	tremolite-actinolite	56.581	0.056	0.2	0.009	2.755	0.179	22.502	13.499	0.042	0.014	95.837
BKL-OSP-07	3	tremolite-actinolite	56.688	0.005	0.395	-	3.277	0.135	22.146	13.598	0.065	0.009	96.318
BKL-OSP-09	1	tremolite-actinolite	57.533	0.003	0.356	0.004	4.21	0.145	21.762	13.209	0.057	0.016	97.295
BKL-OSP-09	2	tremolite-actinolite	56.795	-	0.442	0.065	4.508	0.137	21.252	13.233	0.058	0.006	96.496
BKL-OSP-09	3	tremolite-actinolite	56.992	0.024	0.425	0.043	4.561	0.115	21.45	12.882	0.084	0.084	96.66
BKL-OSP-10	1	tremolite-actinolite	55.904	-	0.804	0.124	4.548	0.169	21.013	13.139	0.063	0.022	95.786
BKL-OSP-10	2	tremolite-actinolite	56.415	-	0.516	0.081	4.077	0.146	21.679	12.797	0.042	0.02	95.773
BKL-OSP-10	3	tremolite-actinolite	56.541	-	0.473	0.137	4.205	0.132	21.66	13.095	0.06	-	96.303
BKL-OSP-11	1	tremolite-actinolite	56.894	-	0.527	0.025	4.091	0.161	21.893	13.21	0.026	0.034	96.861
BKL-OSP-11	2	tremolite-actinolite	56.671	-	0.554	0.068	4.247	0.17	21.247	13.727	0.047	0.001	96.732
BKL-OSP-11	3	tremolite-actinolite	57.022	0.014	0.521	0.085	3.967	0.127	21.811	13.287	0.066	0.02	96.92
BKL-OSP-13	1	tremolite-actinolite	56.734	0.013	0.502	0.033	3.538	0.137	21.844	13.405	0.038	0.009	96.253
BKL-OSP-13	2	tremolite-actinolite	56.578	0.006	0.464	0.039	3.627	0.172	21.833	12.87	0.016	0.017	95.622
BKL-OSP-13	3	tremolite-actinolite	55.907	0.008	0.572	0.178	3.705	0.16	21.621	13.243	0.059	-	95.453
BKL-OSP-13	4	chlorite	29.595	-	19.865	0.285	9.062	0.162	27.074	0.14	-	0.035	86.218
BKL-ULANK-01	1	tremolite-actinolite	56.739	0.047	0.147	0.066	3.162	0.056	22.33	13.351	0.006	0.016	95.92
BKL-ULANK-01	2	tremolite-actinolite	56.161	-	0.22	0.098	3.381	0.065	22.06	13.166	0.023	0.019	95.193
BKL-ULANK-01	3	tremolite-actinolite	56.46	0.039	0.144	0.028	3.182	0.043	22.19	13.433	0.022	0.051	95.592
BKL-ULANK-02	1	tremolite-actinolite	57.284	-	0.389	0.045	3.389	0.064	22.504	13.378	0.06	0.028	97.141
BKL-ULANK-02	2	tremolite-actinolite	56.793	0.01	0.552	0.079	3.401	0.046	22.326	12.932	0.07	0.019	96.228
BKL-ULANK-02	3	tremolite-actinolite	56.868	-	0.52	0.096	3.367	0.054	22.382	12.954	0.052	0.043	96.336
BKL-ULANK-03	1	tremolite-actinolite	56.134	0.007	0.699	0.16	3.583	0.119	21.883	12.97	0.166	0.172	95.893
BKL-ULANK-03	2	tremolite-actinolite	55.659	-	0.623	0.224	3.59	0.105	21.575	13.381	0.138	0.06	95.355
BKL-ULANK-03	3	tremolite-actinolite	55.882	0.024	0.696	0.09	3.678	0.108	21.788	12.963	0.126	0.127	95.482
Kakanui	1	hornblende	41.017	4.859	14.979	-	10.594	0.09	13.003	10.217	2.782	2.185	99.726
Kakanui	2	hornblende	40.634	4.913	14.813	0.042	10.687	0.126	12.93	10.147	2.745	2.138	99.175
Kakanui	3	hornblende	40.514	4.916	14.926	-	10.814	0.127	12.83	10.294	2.762	2.207	99.39
Kakanui	4	hornblende	40.546	4.736	15.057	-	10.878	0.093	12.674	10.424	2.827	2.098	99.333
Kakanui	5	hornblende	40.826	4.969	14.904	0.028	10.684	0.068	12.814	10.315	2.88	2.183	99.671
Kakanui	6	hornblende	40.437	4.853	14.876	-	10.585	0.098	12.985	10.42	2.767	2.235	99.256
- = below detection
