# Supplementary material for: Sensitive and rapid oxygen isotopic analysis of nephrite jade using large-geometry SIMS
Source: Royal Society of Chemistry journal article supplement (doi:10.1039/c8ja00424b), 2019-01-01
Supplement: c8ja00424b3.xlsx [file c8ja00424b3.xlsx]

## Sheet: Tabelle1
							16O	18O	18O/16O		IMF	18O/16O	δ18OVSMOW*	1 s.e.	1 s.e.			δ18OVSMOW*	1 s.d.	n	(Mg+Ca)B	δ18OVSMOW†
Sample	Session	Sequence	I prim ini	I prim fin	Pos X	Pos Y	cps	cps	raw	1 s.e.		IMF corrected	‰	internal	external			‰				‰
																	averages					average
BKL-GG-01	1	1	4.69832e-09	4.73256e-09	2233	4923	3245358000	6379725	0.0019658	1.0057e-07	1.0015	0.00196311	-20.991	0.0511598	0.167715
BKL-GG-01	1	2	4.73055e-09	4.74867e-09	2333	5023	3243741000	6374102	0.00196505	1.32601e-07	1.00111	0.00196236	-21.366	0.0674798	0.167715
BKL-GG-02	1	3	4.77082e-09	4.79499e-09	2533	1023	3416868000	6901510	0.00201983	1.14751e-07		0.00201707	5.91909	0.0568123	0.167715		BKL-GG-02	6.0926	0.516944	10	0.992	5.18492
BKL-GG-02	1	4	4.79298e-09	4.78693e-09	2633	1023	3486217000	7045233	0.00202088	1.2498e-07		0.00201812	6.44101	0.061844	0.167715
BKL-GG-03	1	5	4.79298e-09	4.797e-09	1858	-2877	3311652000	6692035	0.00202075	2.00589e-07		0.00201799	6.37726	0.0992642	0.167715		BKL-GG-03	6.14753	0.272804	10	0.973	5.60161
BKL-GG-03	1	6	4.79499e-09	4.797e-09	1933	-2852	3292886000	6653891	0.00202069	1.29967e-07		0.00201792	6.3434	0.0643185	0.167715
BKL-GG-04	1	7	4.81916e-09	4.80909e-09	-1767	-5127	3318551000	6715256	0.00202355	1.86811e-07		0.00202078	7.77023	0.0923183	0.167715		BKL-GG-04	7.37624	0.500471	10	0.9755	6.78272
BKL-GG-04	1	8	4.8111e-09	4.82721e-09	-1767	-5047	3320417000	6712513	0.00202159	2.27812e-07		0.00201882	6.79311	0.11269	0.167715
BKL-GG-05	1	9	4.83124e-09	4.80909e-09	-1942	98	3285566000	6651930	0.00202459	2.29256e-07		0.00202182	8.28917	0.113235	0.167715		BKL-GG-05	7.47729	0.458145	10	0.9645	7.09321
BKL-GG-05	1	10	4.81916e-09	4.74666e-09	-1917	48	3246896000	6573577	0.00202457	2.74478e-07		0.0020218	8.27871	0.135573	0.167715
BKL-OSP-01	1	11	4.75471e-09	4.75069e-09	-1417	3523	3293118000	6661652	0.0020229	1.74939e-07		0.00202013	7.44651	0.0864792	0.167715		BKL-OSP-01	7.3243	0.25403	10	0.988	6.49278
BKL-OSP-01	1	12	4.78693e-09	4.78492e-09	-1317	3523	3291137000	6659206	0.00202337	1.51286e-07		0.00202061	7.68258	0.0747693	0.167715
BKL-ULANK-01	1	13	4.78693e-09	4.76881e-09	-1467	7123	3316931000	6693911	0.0020181	1.71957e-07		0.00201534	5.05751	0.0852071	0.167715		BKL-ULANK-01	5.47615	0.411057	10	1	4.41615
BKL-ULANK-01	1	14	4.79499e-09	4.79902e-09	-1417	7173	3511531000	7091861	0.00201959	1.36238e-07		0.00201683	5.79856	0.0674584	0.167715
BKL-KHAI-01	1	15	4.797e-09	4.78895e-09	-5917	723	3187633000	6279071	0.00196982	1.2879e-07		0.00196713	-18.9879	0.0653814	0.167715		BKL-KHAI-01	-18.8492	0.375094	10	1	-19.9092
BKL-KHAI-01	1	16	4.81714e-09	4.80909e-09	-5967	773	3172016000	6249121	0.00197008	1.03908e-07		0.00196738	-18.8599	0.0527432	0.167715
BKL-GOLI-01	1	17	4.82318e-09	4.80103e-09	-6017	-3427	3174063000	6244529	0.00196736	1.35921e-07		0.00196467	-20.2136	0.0690877	0.167715		BKL-GOLI-01	-19.5146	0.914905	10	1	-20.5746
BKL-GOLI-01	1	18	4.81714e-09	4.80707e-09	-5967	-3377	3174630000	6242176	0.00196627	1.64607e-07		0.00196358	-20.7574	0.0837153	0.167715
BKL-GG-01	1	19	4.8252e-09	4.81916e-09	2433	4923	3279591000	6445097	0.00196521	1.1139e-07	1.0012	0.00196252	-21.2828	0.056681	0.167715
BKL-GG-01	1	20	4.81513e-09	4.80707e-09	2533	5023	3280497000	6448606	0.00196574	2.1425e-07	1.00147	0.00196305	-21.0203	0.108992	0.167715
BKL-GG-02	1	21	4.82923e-09	4.80506e-09	2683	1073	3470615000	7016624	0.00202172	2.05856e-07		0.00201896	6.86034	0.101822	0.167715
BKL-GG-02	1	22	4.80909e-09	4.81513e-09	2783	1073	3355555000	6778541	0.00202009	2.59626e-07		0.00201733	6.04907	0.128522	0.167715
BKL-GG-03	1	23	4.8252e-09	4.81513e-09	1958	-2752	3358685000	6785601	0.00202031	1.58588e-07		0.00201755	6.15814	0.0784969	0.167715
BKL-GG-03	1	24	4.80506e-09	4.80707e-09	2058	-2752	3327675000	6721956	0.00202002	1.91074e-07		0.00201725	6.00923	0.0945905	0.167715
BKL-GG-04	1	25	4.83124e-09	4.81311e-09	-1727	-5047	3270914000	6613744	0.00202199	1.5007e-07		0.00201922	6.99083	0.0742192	0.167715
BKL-GG-04	1	26	4.81714e-09	4.81311e-09	-2097	-4912	3302305000	6680125	0.00202287	1.32208e-07		0.0020201	7.42958	0.0653566	0.167715
BKL-GG-05	1	27	4.82721e-09	4.81513e-09	-1867	48	3266968000	6609358	0.00202308	1.15441e-07		0.00202032	7.53815	0.0570617	0.167715
BKL-GG-05	1	28	4.85138e-09	4.81311e-09	-1742	-77	3296360000	6667483	0.00202268	1.01331e-07		0.00201991	7.33645	0.0500974	0.167715
BKL-OSP-01	1	29	4.83929e-09	4.81714e-09	-1467	3473	3331793000	6740263	0.00202301	1.28046e-07		0.00202024	7.50229	0.0632949	0.167715
BKL-OSP-01	1	30	4.83527e-09	4.82721e-09	-1367	3473	3312790000	6702479	0.00202321	1.31129e-07		0.00202044	7.6019	0.0648123	0.167715
BKL-ULANK-01	1	31	4.82721e-09	4.83325e-09	-1367	7123	3338262000	6740655	0.00201921	1.08411e-07		0.00201645	5.60882	0.0536897	0.167715
BKL-ULANK-01	1	32	4.83325e-09	4.84332e-09	-1317	7073	3346917000	6756177	0.00201863	1.18437e-07		0.00201586	5.31748	0.058672	0.167715
BKL-KHAI-01	1	33	4.86346e-09	4.84936e-09	-5917	823	3279883000	6464865	0.00197107	7.85487e-08		0.00196837	-18.3684	0.0398509	0.167715
BKL-KHAI-01	1	34	4.85541e-09	4.83527e-09	-5917	923	3208492000	6323935	0.001971	1.62003e-07		0.0019683	-18.4018	0.0821932	0.167715
BKL-GOLI-01	1	35	4.87353e-09	4.84332e-09	-5967	-3477	3217417000	6327722	0.00196671	1.63703e-07		0.00196402	-20.5388	0.0832368	0.167715
BKL-GOLI-01	1	36	4.86547e-09	4.86749e-09	-5867	-3477	3189747000	6272845	0.00196656	1.77077e-07		0.00196387	-20.6105	0.090044	0.167715
BKL-GG-01	1	37	4.87957e-09	4.84735e-09	2633	4923	3305917000	6497463	0.0019654	1.0391e-07	1.00129	0.00196271	-21.1882	0.0528695	0.167715
BKL-GG-01	1	38	4.85138e-09	4.84735e-09	2733	5023	3316047000	6517547	0.00196546	1.31236e-07	1.00132	0.00196277	-21.1623	0.066771	0.167715
BKL-GG-02	1	39	4.87152e-09	4.85138e-09	2833	1123	3381295000	6829277	0.00201972	2.04029e-07		0.00201696	5.86331	0.101019	0.167715
BKL-GG-02	1	40	4.86547e-09	4.85138e-09	2908	1173	3361938000	6797634	0.00202194	2.83384e-07		0.00201917	6.96692	0.140155	0.167715
BKL-GG-03	1	41	4.86547e-09	4.85138e-09	2058	-2827	3353169000	6772772	0.00201981	3.46062e-07		0.00201705	5.90763	0.171334	0.167715
BKL-GG-03	1	42	4.86346e-09	4.84936e-09	2133	-2827	3334805000	6738684	0.00202071	1.73673e-07		0.00201795	6.35685	0.0859463	0.167715
BKL-GG-04	1	43	4.86749e-09	4.82923e-09	-2147	-4852	3340143000	6761244	0.00202424	9.94954e-08		0.00202147	8.11237	0.049152	0.167715
BKL-GG-04	1	44	4.84936e-09	4.85339e-09	-2097	-4822	3320102000	6718982	0.00202373	1.56083e-07		0.00202096	7.85838	0.0771265	0.167715
BKL-GG-05	1	45	4.88159e-09	4.87152e-09	-1692	-2	3325313000	6725670	0.00202257	1.23292e-07		0.0020198	7.27968	0.060958	0.167715
BKL-GG-05	1	46	4.91582e-09	4.87957e-09	-1667	-127	3359635000	6795384	0.00202265	1.56573e-07		0.00201989	7.324	0.0774095	0.167715
BKL-OSP-01	1	47	4.90172e-09	4.87152e-09	-1267	3473	3350726000	6776013	0.00202225	2.17671e-07		0.00201948	7.1233	0.107638	0.167715
BKL-OSP-01	1	48	4.88964e-09	4.87554e-09	-1167	3423	3379171000	6835964	0.00202297	1.3451e-07		0.0020202	7.48138	0.0664911	0.167715
BKL-ULANK-01	1	49	4.90172e-09	4.88159e-09	-1267	7123	3320455000	6701489	0.00201824	1.61949e-07		0.00201548	5.12723	0.0802423	0.167715
BKL-ULANK-01	1	50	4.91179e-09	4.8977e-09	-1267	7023	3381122000	6826934	0.00201913	1.89033e-07		0.00201637	5.56947	0.0936207	0.167715
BKL-KHAI-01	1	51	4.89367e-09	4.88159e-09	-6017	973	3217154000	6338889	0.00197034	3.26679e-07		0.00196764	-18.7309	0.165798	0.167715
BKL-KHAI-01	1	52	4.92589e-09	4.8836e-09	-6017	1073	3237775000	6373741	0.00196856	2.64497e-07		0.00196586	-19.6179	0.134361	0.167715
BKL-GOLI-01	1	53	4.92186e-09	4.87353e-09	-5867	-3377	3209875000	6322005	0.00196955	1.03777e-07		0.00196685	-19.1244	0.0526908	0.167715
BKL-GOLI-01	1	54	4.91784e-09	4.89166e-09	-5767	-3377	3400742000	6701672	0.00197065	1.32964e-07		0.00196795	-18.5751	0.0674721	0.167715
BKL-GG-01	1	55	4.90172e-09	4.88964e-09	2833	4923	3310390000	6506413	0.00196545	2.48562e-07	1.00132	0.00196276	-21.1638	0.126465	0.167715
BKL-GG-01	1	56	4.90978e-09	4.8977e-09	2733	4823	3326429000	6537888	0.00196544	1.466e-07	1.00131	0.00196275	-21.1717	0.0745892	0.167715
BKL-GG-02	1	57	4.91784e-09	4.89971e-09	2458	698	3410284000	6884052	0.00201862	1.47227e-07		0.00201585	5.312	0.0729349	0.167715
BKL-GG-02	1	58	4.88561e-09	4.90172e-09	2533	698	3439949000	6948643	0.00201998	1.90279e-07		0.00201722	5.99329	0.0941981	0.167715
BKL-GG-03	1	59	4.91179e-09	4.89166e-09	2233	-2727	3355626000	6782690	0.00202129	1.09584e-07		0.00201852	6.64371	0.0542148	0.167715
BKL-GG-03	1	60	4.90172e-09	4.88763e-09	2283	-2777	3350978000	6768644	0.0020199	1.54442e-07		0.00201714	5.95295	0.07646	0.167715
BKL-GG-04	1	61	4.90374e-09	4.87756e-09	-2097	-4722	3331665000	6737930	0.00202239	1.51686e-07		0.00201962	7.19252	0.0750033	0.167715
BKL-GG-04	1	62	4.89367e-09	4.89166e-09	-1872	-4747	3356686000	6786199	0.0020217	1.576e-07		0.00201893	6.8464	0.0779543	0.167715
BKL-GG-05	1	63	4.8977e-09	4.80909e-09	-1667	-602	3303059000	6682096	0.002023	2.36153e-07		0.00202023	7.49681	0.116734	0.167715
BKL-GG-05	1	64	4.84332e-09	4.89367e-09	-1532	-527	3299071000	6672003	0.00202239	1.57466e-07		0.00201962	7.19103	0.0778613	0.167715
BKL-OSP-01	1	65	4.90575e-09	4.89367e-09	-1367	3323	3359019000	6792061	0.00202204	1.05951e-07		0.00201927	7.01622	0.0523981	0.167715
BKL-OSP-01	1	66	4.90978e-09	4.87957e-09	-1267	3323	3504080000	7087475	0.00202263	1.30285e-07		0.00201987	7.31354	0.0644135	0.167715
BKL-ULANK-01	1	67	4.89971e-09	4.87554e-09	-1217	7323	3366010000	6795797	0.00201895	1.57185e-07		0.00201618	5.47734	0.0778549	0.167715
BKL-ULANK-01	1	68	4.88964e-09	4.88561e-09	-1017	7323	3365407000	6792113	0.00201821	1.03029e-07		0.00201545	5.11229	0.0510493	0.167715
BKL-KHAI-01	1	69	4.8977e-09	4.88964e-09	-6217	1123	3221189000	6347568	0.00197057	1.09572e-07		0.00196787	-18.6169	0.0556045	0.167715
BKL-KHAI-01	1	70	4.88964e-09	4.88964e-09	-6267	1173	3205446000	6314832	0.00197003	1.41011e-07		0.00196734	-18.8833	0.0715779	0.167715
BKL-GOLI-01	1	71	4.87957e-09	4.88561e-09	-5717	-3327	3322028000	6544318	0.00196998	1.48398e-07		0.00196728	-18.9107	0.0753297	0.167715
BKL-GOLI-01	1	72	4.89568e-09	4.89568e-09	-5617	-3327	3123045000	6150468	0.00196938	1.25205e-07		0.00196669	-19.2071	0.0635757	0.167715
BKL-GG-01	1	73	4.8977e-09	4.89971e-09	2633	4723	3325912000	6538045	0.00196579	7.45636e-08	1.00149	0.0019631	-20.9959	0.0379306	0.167715
BKL-GG-01	1	74	4.91381e-09	4.90172e-09	2733	4623	3322637000	6533027	0.00196622	8.74364e-08	1.00171	0.00196353	-20.7828	0.0444693	0.167715
BKL-GG-02	1	75	4.91985e-09	4.89971e-09	2533	748	3421604000	6909622	0.00201941	1.86249e-07		0.00201665	5.70842	0.0922295	0.167715
BKL-GG-02	1	76	4.92186e-09	4.89367e-09	2533	798	3428667000	6924603	0.00201962	1.31907e-07		0.00201686	5.81251	0.0653127	0.167715
BKL-GG-03	1	77	4.90172e-09	4.91381e-09	2383	-2777	3324696000	6714441	0.00201957	8.50937e-08		0.0020168	5.78512	0.0421347	0.167715
BKL-GG-03	1	78	4.91582e-09	4.89971e-09	2333	-2677	3324773000	6715638	0.00201988	1.31703e-07		0.00201711	5.941	0.0652033	0.167715
BKL-GG-04	1	79	4.92992e-09	4.92589e-09	-1867	-4882	3334297000	6747945	0.0020238	1.18954e-07		0.00202103	7.89374	0.0587774	0.167715
BKL-GG-04	1	80	4.90978e-09	4.8977e-09	-2167	-4582	3411384000	6896979	0.00202175	7.53919e-08		0.00201899	6.87528	0.0372904	0.167715
BKL-GG-05	1	81	4.88763e-09	4.91582e-09	-1462	-687	3320649000	6714472	0.00202204	9.70348e-08		0.00201927	7.01523	0.0479887	0.167715
BKL-GG-05	1	82	4.89971e-09	4.90172e-09	-1372	-667	3310265000	6693532	0.00202205	1.4234e-07		0.00201928	7.0237	0.0703938	0.167715
BKL-OSP-01	1	83	4.9279e-09	4.90172e-09	-1217	3273	3325135000	6723998	0.00202217	1.79678e-07		0.0020194	7.08396	0.0888539	0.167715
BKL-OSP-01	1	84	4.91985e-09	4.85541e-09	-1167	3173	3355092000	6783953	0.00202199	1.13205e-07		0.00201922	6.99132	0.055987	0.167715
BKL-ULANK-01	1	85	4.92186e-09	4.89367e-09	-1017	7223	3369897000	6802247	0.00201853	1.7479e-07		0.00201577	5.27116	0.0865928	0.167715
BKL-ULANK-01	1	86	4.9561e-09	4.84131e-09	-917	7223	3488542000	7049784	0.00202084	2.55285e-07		0.00201808	6.42159	0.126326	0.167715
BKL-KHAI-01	1	87	4.87353e-09	4.93999e-09	-6167	1273	3249538000	6402329	0.00197023	9.70586e-08		0.00196753	-18.7862	0.0492627	0.167715
BKL-KHAI-01	1	88	4.93596e-09	4.95811e-09	-6117	1373	3237968000	6376590	0.00196932	1.44991e-07		0.00196662	-19.2384	0.0736251	0.167715
BKL-GOLI-01	1	89	4.942e-09	4.92186e-09	-5567	-3427	3186343000	6277554	0.00197014	1.0124e-07		0.00196745	-18.8276	0.051387	0.167715
BKL-GOLI-01	1	90	4.95006e-09	4.94804e-09	-5467	-3427	3198504000	6304367	0.00197104	1.49916e-07		0.00196834	-18.3813	0.0760595	0.167715
BKL-OSP-02	2	1	2.75093e-09	2.77912e-09	2343	5138	1501915000	3042099	0.00202548	2.54638e-07		0.00201931	7.03819	0.125717	0.423675		BKL-OSP-02	7.37354	0.303098	10	0.9885	7.6325
BKL-OSP-02	2	2	2.77711e-09	2.78315e-09	2413	5238	1524632000	3089627	0.00202647	2.3022e-07		0.0020203	7.5314	0.113606	0.423675
BKL-OSP-02	2	3	2.78919e-09	2.80731e-09	2463	5238	1528155000	3097148	0.00202673	1.68375e-07		0.00202055	7.65669	0.0830774	0.423675
BKL-OSP-02	2	4	2.79322e-09	2.80731e-09	2613	5088	1543110000	3126706	0.00202624	2.23546e-07		0.00202007	7.41407	0.110326	0.423675
BKL-OSP-02	2	5	2.80731e-09	2.79523e-09	2663	5138	1538100000	3115509	0.00202556	2.26492e-07		0.00201939	7.07598	0.111817	0.423675
BKL-OSP-07	2	6	2.79322e-09	2.81738e-09	2363	908	1569727000	3179708	0.00202564	2.03644e-07		0.00201948	7.11923	0.100533	0.423675		BKL-OSP-07	7.31955	0.319949	10	1	7.35955
BKL-OSP-07	2	7	2.80731e-09	2.79725e-09	2413	908	1565642000	3172282	0.00202618	2.53184e-07		0.00202001	7.38821	0.124956	0.423675
BKL-OSP-07	2	8	2.79523e-09	2.80329e-09	2363	758	1545184000	3131543	0.00202665	2.38917e-07		0.00202048	7.61791	0.117888	0.423675
BKL-OSP-07	2	9	2.81134e-09	2.81336e-09	2438	833	1554939000	3149818	0.00202569	2.2936e-07		0.00201952	7.14012	0.113226	0.423675
BKL-OSP-07	2	10	2.80329e-09	2.80127e-09	2513	908	1546072000	3134422	0.00202735	2.62783e-07		0.00202117	7.96594	0.129619	0.423675
BKL-OSP-10	2	11	2.81336e-09	2.80329e-09	2263	-3737	1578411000	3198145	0.00202618	2.57101e-07		0.00202001	7.38622	0.12689	0.423675		BKL-OSP-10	7.23339	0.310006	10	0.9795	7.66371
BKL-OSP-10	2	12	2.80933e-09	2.79926e-09	2288	-3687	1569365000	3177811	0.0020249	1.44801e-07		0.00201874	6.75032	0.0715102	0.423675
BKL-OSP-10	2	13	2.81738e-09	2.79926e-09	2313	-3662	1542290000	3124393	0.00202581	2.02141e-07		0.00201965	7.20425	0.0997824	0.423675
BKL-OSP-10	2	14	2.80127e-09	2.7912e-09	2338	-3712	1554830000	3151158	0.00202669	2.58965e-07		0.00202052	7.63979	0.127777	0.423675
BKL-OSP-10	2	15	2.80127e-09	2.80933e-09	2413	-3687	1548316000	3135646	0.0020252	2.30874e-07		0.00201903	6.89749	0.114001	0.423675
BKL-OSP-13	2	16	2.80933e-09	2.80731e-09	-1137	-5212	1569184000	3178563	0.00202562	2.28451e-07		0.00201945	7.10482	0.112781	0.423675		BKL-OSP-13	7.1955	0.209859	10	0.9905	7.41638
BKL-OSP-13	2	17	2.80933e-09	2.80329e-09	-1187	-5312	1559822000	3159109	0.0020253	1.52204e-07		0.00201913	6.9487	0.0751515	0.423675
BKL-OSP-13	2	18	2.79322e-09	2.80127e-09	-1087	-5362	1558907000	3158452	0.00202607	2.11007e-07		0.0020199	7.33004	0.104146	0.423675
BKL-OSP-13	2	19	2.78919e-09	2.80731e-09	-987	-5312	1550714000	3141847	0.00202607	2.34941e-07		0.0020199	7.32855	0.115959	0.423675
BKL-OSP-13	2	20	2.80329e-09	2.80933e-09	-937	-5162	1560211000	3161169	0.00202612	1.85113e-07		0.00201995	7.35341	0.0913637	0.423675
BKL-GG-16	2	21	2.80933e-09	2.80127e-09	-1737	-912	1543312000	3122558	0.00202328	2.54452e-07		0.00201712	5.94588	0.125762	0.423675		BKL-GG-16	6.19482	0.388936	10	0.9925	6.37762
BKL-GG-16	2	22	2.8053e-09	2.80933e-09	-1737	-812	1543637000	3122568	0.00202286	1.38727e-07		0.0020167	5.73706	0.0685796	0.423675
BKL-GG-16	2	23	2.81134e-09	2.80127e-09	-1637	-712	1555252000	3148332	0.00202432	1.37327e-07		0.00201816	6.46196	0.0678386	0.423675
BKL-GG-16	2	24	2.8053e-09	2.81537e-09	-1587	-762	1558268000	3152031	0.00202278	2.32318e-07		0.00201662	5.6943	0.114851	0.423675
BKL-GG-16	2	25	2.81738e-09	2.80127e-09	-1487	-712	1550288000	3139153	0.00202488	2.167e-07		0.00201872	6.74088	0.107018	0.423675
BKL-KAV-01	2	26	2.80731e-09	2.80731e-09	-1837	2888	1496920000	2947481	0.00196903	2.39042e-07	1.00309	0.00196303	-21.0279	0.121401	0.423675
BKL-KAV-01	2	27	2.81134e-09	2.81336e-09	-1737	2838	1501220000	2956887	0.00196966	2.304e-07	1.0034	0.00196366	-20.7171	0.116975	0.423675
BKL-KAV-01	2	28	2.80731e-09	2.80329e-09	-1687	2938	1512369000	2977334	0.00196866	1.95567e-07	1.00289	0.00196266	-21.2148	0.0993405	0.423675
BKL-KAV-01	2	29	2.80731e-09	2.8053e-09	-1587	2938	1507697000	2968652	0.001969	2.11095e-07	1.00307	0.001963	-21.0448	0.10721	0.423675
BKL-KAV-01	2	30	2.8053e-09	2.80127e-09	-1587	2838	1503755000	2958846	0.00196764	2.13412e-07	1.00238	0.00196165	-21.7205	0.108461	0.423675
BKL-KHAM-02	2	31	2.81134e-09	2.80127e-09	-1537	6688	1544879000	3144709	0.00203557	1.98588e-07		0.00202937	12.0543	0.0975587	0.423675		BKL-KHAM-02	11.7193	0.322239	10	1	11.7593
BKL-KHAM-02	2	32	2.80329e-09	2.80127e-09	-1487	6738	1550947000	3155769	0.00203474	2.56116e-07		0.00202854	11.6406	0.125872	0.423675
BKL-KHAM-02	2	33	2.8053e-09	2.80329e-09	-1487	6838	1554174000	3161734	0.00203435	2.98275e-07		0.00202815	11.4477	0.146619	0.423675
BKL-KHAM-02	2	34	2.80731e-09	2.80933e-09	-1387	6838	1552449000	3158574	0.00203457	2.22278e-07		0.00202838	11.5596	0.10925	0.423675
BKL-KHAM-02	2	35	2.80127e-09	2.80731e-09	-1287	6838	1545776000	3145640	0.00203499	2.47918e-07		0.0020288	11.7669	0.121827	0.423675
BKL-KHARG-01	2	36	2.81738e-09	2.78919e-09	-5737	4688	1542672000	3135743	0.00203267	2.82236e-07		0.00202648	10.6134	0.13885	0.423675		BKL-KHARG-01	10.961	0.263741	10	1	11.001
BKL-KHARG-01	2	37	2.8053e-09	2.7912e-09	-5687	4738	1548398000	3147254	0.00203259	2.22486e-07		0.0020264	10.5717	0.109459	0.423675
BKL-KHARG-01	2	38	2.79322e-09	2.8053e-09	-5637	4788	1548050000	3147740	0.00203336	2.16409e-07		0.00202717	10.9545	0.106429	0.423675
BKL-KHARG-01	2	39	2.79725e-09	2.80127e-09	-5587	4888	1552860000	3157451	0.00203332	2.38511e-07		0.00202712	10.9336	0.117302	0.423675
BKL-KHARG-01	2	40	2.80127e-09	2.80933e-09	-5537	4838	1555621000	3163689	0.00203372	1.86472e-07		0.00202752	11.132	0.0916903	0.423675
BKL-KHARG-02	2	41	2.81134e-09	2.80933e-09	-6037	538	1545409000	3143735	0.00203424	2.6135e-07		0.00202805	11.3935	0.128476	0.423675		BKL-KHARG-02	10.8913	0.521017	10	0.9705	11.493
BKL-KHARG-02	2	42	2.80933e-09	2.79926e-09	-5937	588	1549205000	3150617	0.0020337	3.45592e-07		0.00202751	11.1241	0.169933	0.423675
BKL-KHARG-02	2	43	2.80329e-09	2.81336e-09	-5887	688	1539646000	3129018	0.0020323	2.78433e-07		0.00202611	10.4265	0.137004	0.423675
BKL-KHARG-02	2	44	2.80933e-09	2.81537e-09	-5737	688	1540349000	3133365	0.00203419	1.75353e-07		0.002028	11.3682	0.086203	0.423675
BKL-KHARG-02	2	45	2.81537e-09	2.81134e-09	-5737	588	1546669000	3145595	0.00203379	2.13189e-07		0.00202759	11.1678	0.104824	0.423675
BKL-ULANK-03	2	46	2.80731e-09	2.81738e-09	-5387	-3512	1527606000	3091833	0.00202397	2.30213e-07		0.00201781	6.28844	0.113743	0.423675		BKL-ULANK-03	6.00186	0.313055	10	0.989	6.2513
BKL-ULANK-03	2	47	2.79926e-09	2.79926e-09	-5337	-3562	1492648000	3021706	0.00202439	3.37001e-07		0.00201823	6.49726	0.16647	0.423675
BKL-ULANK-03	2	48	2.8053e-09	2.81336e-09	-5287	-3412	1499699000	3034319	0.00202329	2.2282e-07		0.00201712	5.94638	0.110128	0.423675
BKL-ULANK-03	2	49	2.80731e-09	2.7912e-09	-5187	-3412	1516721000	3069834	0.00202399	2.11624e-07		0.00201783	6.29888	0.104557	0.423675
BKL-ULANK-03	2	50	2.80731e-09	2.80329e-09	-5237	-3562	1497175000	3030084	0.00202387	3.12908e-07		0.00201771	6.23673	0.154609	0.423675
BKL-OSP-02	2	51	2.78919e-09	2.79322e-09	2523	5028	1451978000	2942971	0.00202687	2.3925e-07		0.0020207	7.72829	0.118039	0.423675
BKL-OSP-02	2	52	2.79523e-09	2.77912e-09	2623	5078	1441003000	2918437	0.00202528	2.1241e-07		0.00201911	6.93925	0.104879	0.423675
BKL-OSP-02	2	53	2.79322e-09	2.79926e-09	2673	5128	1462482000	2964307	0.0020269	1.5969e-07		0.00202073	7.7442	0.0787853	0.423675
BKL-OSP-02	2	54	2.79725e-09	2.79523e-09	2723	5103	1457100000	2951609	0.00202567	2.63054e-07		0.00201951	7.13415	0.12986	0.423675
BKL-OSP-02	2	55	2.8053e-09	2.8053e-09	2743	4933	1470725000	2980211	0.00202636	1.8291e-07		0.00202019	7.47323	0.0902657	0.423675
BKL-OSP-07	2	56	2.80933e-09	2.78718e-09	2588	1113	1448556000	2934725	0.00202597	2.44176e-07		0.0020198	7.27983	0.120523	0.423675
BKL-OSP-07	2	57	2.78919e-09	2.77308e-09	2613	1063	1406252000	2849164	0.00202607	4.07961e-07		0.0020199	7.32905	0.201356	0.423675
BKL-OSP-07	2	58	2.7912e-09	2.79322e-09	2663	1038	1422208000	2881747	0.00202625	1.75151e-07		0.00202008	7.42003	0.0864411	0.423675
BKL-OSP-07	2	59	2.78718e-09	2.78919e-09	2663	1163	1435220000	2907375	0.00202574	2.30536e-07		0.00201957	7.16498	0.113804	0.423675
BKL-OSP-07	2	60	2.78919e-09	2.79725e-09	2713	1163	1430664000	2897011	0.00202494	1.90554e-07		0.00201878	6.77021	0.0941036	0.423675
BKL-OSP-10	2	61	2.7912e-09	2.78919e-09	2463	-3412	1445376000	2928654	0.00202622	2.56888e-07		0.00202005	7.4076	0.126782	0.423675
BKL-OSP-10	2	62	2.79725e-09	2.78516e-09	2563	-3412	1471668000	2980465	0.00202523	1.74433e-07		0.00201906	6.91241	0.0861299	0.423675
BKL-OSP-10	2	63	2.80933e-09	2.78919e-09	2613	-3362	1460800000	2960505	0.00202663	2.99763e-07		0.00202046	7.61145	0.147912	0.423675
BKL-OSP-10	2	64	2.7912e-09	2.79523e-09	2663	-3312	1466286000	2970124	0.00202561	1.99466e-07		0.00201944	7.10183	0.098472	0.423675
BKL-OSP-10	2	65	2.78718e-09	2.79725e-09	2713	-3362	1469805000	2978199	0.00202625	2.68782e-07		0.00202008	7.42252	0.13265	0.423675
BKL-OSP-13	2	66	2.80731e-09	2.80127e-09	-1537	-5512	1485647000	3010013	0.00202606	1.50061e-07		0.00201989	7.32606	0.0740656	0.423675
BKL-OSP-13	2	67	2.80329e-09	2.80127e-09	-1537	-5612	1488876000	3015579	0.00202541	1.93636e-07		0.00201924	7.0009	0.0956034	0.423675
BKL-OSP-13	2	68	2.80329e-09	2.80933e-09	-1437	-5612	1494235000	3026690	0.00202558	2.64664e-07		0.00201941	7.08592	0.130661	0.423675
BKL-OSP-13	2	69	2.80731e-09	2.81336e-09	-1437	-5512	1500789000	3039478	0.00202525	2.46848e-07		0.00201909	6.92533	0.121885	0.423675
BKL-OSP-13	2	70	2.80731e-09	2.81537e-09	-1437	-5412	1487552000	3014543	0.00202651	1.43677e-07		0.00202034	7.55129	0.0708987	0.423675
BKL-GG-16	2	71	2.79523e-09	2.79725e-09	-1737	-1112	1484113000	3003067	0.00202347	2.52227e-07		0.00201731	6.04084	0.124651	0.423675
BKL-GG-16	2	72	2.79523e-09	2.79725e-09	-1637	-1162	1475017000	2986564	0.00202477	2.84035e-07		0.0020186	6.68271	0.14028	0.423675
BKL-GG-16	2	73	2.79725e-09	2.80127e-09	-1637	-1062	1475327000	2986036	0.00202398	3.29712e-07		0.00201782	6.29291	0.162903	0.423675
BKL-GG-16	2	74	2.79523e-09	2.80329e-09	-1587	-1012	1463427000	2960679	0.00202311	1.72306e-07		0.00201695	5.86136	0.085169	0.423675
BKL-GG-16	2	75	2.80127e-09	2.79322e-09	-1537	-962	1459528000	2954639	0.00202438	2.60067e-07		0.00201821	6.4903	0.128468	0.423675
BKL-KAV-01	2	76	2.79523e-09	2.80127e-09	-1637	2688	1410595000	2776749	0.00196849	2.55598e-07	1.00281	0.0019625	-21.2949	0.129845	0.423675
BKL-KAV-01	2	77	2.79725e-09	2.80127e-09	-1562	2663	1413061000	2780951	0.00196803	1.77821e-07	1.00258	0.00196204	-21.5236	0.0903548	0.423675
BKL-KAV-01	2	78	2.79725e-09	2.79926e-09	-1587	2613	1407178000	2771944	0.00196986	2.64684e-07	1.00351	0.00196386	-20.6162	0.134367	0.423675
BKL-KAV-01	2	79	2.77912e-09	2.77912e-09	-1587	2563	1400636000	2757664	0.00196887	2.00028e-07	1.003	0.00196287	-21.1099	0.101596	0.423675
BKL-KAV-01	2	80	2.78718e-09	2.78919e-09	-1587	2513	1397341000	2753435	0.00197048	2.78489e-07	1.00382	0.00196448	-20.307	0.14133	0.423675
BKL-KHAM-02	2	81	2.7912e-09	2.79322e-09	-1387	6988	1430881000	2912381	0.00203537	1.49998e-07		0.00202918	11.9573	0.0736957	0.423675
BKL-KHAM-02	2	82	2.79926e-09	2.78718e-09	-1337	7013	1425843000	2899639	0.00203363	2.59028e-07		0.00202744	11.0902	0.127372	0.423675
BKL-KHAM-02	2	83	2.77308e-09	2.78315e-09	-1237	6613	1433029000	2916901	0.00203548	2.42372e-07		0.00202928	12.0095	0.119074	0.423675
BKL-KHAM-02	2	84	2.78516e-09	2.80329e-09	-1137	6813	1433400000	2917943	0.00203568	2.11429e-07		0.00202948	12.109	0.103862	0.423675
BKL-KHAM-02	2	85	2.7912e-09	2.8053e-09	-1087	7013	1418339000	2885713	0.00203457	2.61926e-07		0.00202838	11.5576	0.128738	0.423675
BKL-KHARG-01	2	86	2.77912e-09	2.78315e-09	-5587	4488	1438093000	2924951	0.00203391	2.56708e-07		0.00202772	11.229	0.126214	0.423675
BKL-KHARG-01	2	87	2.56364e-09	2.60996e-09	-5637	4588	1820008000	3700650	0.00203331	2.629e-07		0.00202712	10.9331	0.129296	0.423675
BKL-KHARG-01	2	88	2.59385e-09	2.62204e-09	-5587	4613	1799995000	3660800	0.00203378	2.33641e-07		0.00202759	11.1658	0.11488	0.423675
BKL-KHARG-01	2	89	2.61801e-09	2.63211e-09	-5537	4588	1795934000	3650946	0.00203289	2.10543e-07		0.0020267	10.7243	0.103568	0.423675
BKL-KHARG-01	2	90	2.63009e-09	2.62808e-09	-5487	4613	1792165000	3645548	0.00203416	3.54089e-07		0.00202796	11.3523	0.174071	0.423675
BKL-KHARG-02	2	91	2.62405e-09	2.63211e-09	-6037	388	1824335000	3707636	0.00203232	1.39734e-07		0.00202613	10.4394	0.0687557	0.423675
BKL-KHARG-02	2	92	2.64218e-09	2.63412e-09	-5987	413	1806893000	3674894	0.00203382	1.73015e-07		0.00202763	11.1842	0.0850691	0.423675
BKL-KHARG-02	2	93	2.64016e-09	2.63614e-09	-5937	338	1861441000	3780489	0.00203095	2.54945e-07		0.00202476	9.75581	0.12553	0.423675
BKL-KHARG-02	2	94	2.63412e-09	2.63815e-09	-5837	338	1806102000	3672784	0.00203354	2.95845e-07		0.00202735	11.046	0.145483	0.423675
BKL-KHARG-02	2	95	2.64218e-09	2.64218e-09	-5737	389	1825283000	3711651	0.00203346	2.47499e-07		0.00202727	11.0077	0.121713	0.423675
BKL-ULANK-03	2	96	2.64016e-09	2.65225e-09	-5437	-3612	1787105000	3614242	0.0020224	1.9791e-07		0.00201624	5.50637	0.0978592	0.423675
BKL-ULANK-03	2	97	2.64419e-09	2.64822e-09	-5387	-3662	1795840000	3632650	0.00202281	2.25356e-07		0.00201665	5.7122	0.111407	0.423675
BKL-ULANK-03	2	98	2.63815e-09	2.64218e-09	-5337	-3712	1812359000	3666385	0.00202299	1.89172e-07		0.00201683	5.79971	0.0935109	0.423675
BKL-ULANK-03	2	99	2.64621e-09	2.63412e-09	-5287	-3662	1810373000	3662693	0.00202317	1.60324e-07		0.00201701	5.8887	0.0792442	0.423675
BKL-ULANK-03	2	100	2.64218e-09	2.65627e-09	-5237	-3712	1820178000	3682364	0.00202308	2.34844e-07		0.00201692	5.84396	0.116083	0.423675
BKL-GG-01	3	1	3.04092e-09	3.05905e-09	3100	4530	1899502000	3736276	0.00196698	2.96841e-07	1.00209	0.00196266	-21.2146	0.150912	0.290536
BKL-GG-01	3	2	3.06509e-09	3.0812e-09	3100	4430	1889594000	3716219	0.00196668	2.11514e-07	1.00194	0.00196236	-21.3644	0.107549	0.290536
BKL-GG-14	3	3	3.07314e-09	3.08925e-09	2600	30	1965531000	3973162	0.00202142	2.83519e-07		0.00201698	5.87672	0.140257	0.290536		BKL-GG-14	5.84803	0.0644482	3	0.9905	4.96891
BKL-GG-14	3	4	3.08724e-09	3.08523e-09	2600	130	1976806000	3995547	0.00202121	1.71667e-07		0.00201678	5.77422	0.0849328	0.290536
BKL-GG-14	3	5	3.08925e-09	3.10134e-09	2700	130	1964150000	3970433	0.00202145	1.70062e-07		0.00201702	5.89314	0.0841286	0.290536
BKL-GG-01	3	6	3.10335e-09	3.10335e-09	3200	4430	1858215000	3656915	0.00196797	1.90067e-07	1.0026	0.00196365	-20.7195	0.0965804	0.290536
BKL-GG-01	3	7	3.09328e-09	3.0953e-09	3300	4330	1848380000	3635953	0.0019671	2.36014e-07	1.00216	0.00196208	-21.5036	0.11998	0.290536
BKL-BOR-03	3	8	3.08724e-09	3.09328e-09	2600	-3995	1865219000	3768844	0.00202059	2.30909e-07		0.00201543	5.10246	0.114278	0.290536		BKL-BOR-03	5.03829	0.0817376	3	1	3.97829
BKL-BOR-03	3	9	3.10335e-09	3.08321e-09	2825	-4220	1868016000	3773911	0.00202028	1.87734e-07		0.00201512	4.94627	0.092925	0.290536
BKL-BOR-03	3	10	3.0953e-09	3.0953e-09	2850	-4120	1844843000	3727538	0.00202052	1.29999e-07		0.00201536	5.06615	0.0643395	0.290536
BKL-GG-01	3	11	3.07919e-09	3.08321e-09	3300	4230	1846584000	3634219	0.00196808	2.20997e-07	1.00266	0.00196305	-21.0191	0.112291	0.290536
BKL-GG-01	3	12	3.08925e-09	3.08724e-09	3300	4130	1848792000	3639171	0.00196841	2.41857e-07	1.00282	0.0019629	-21.093	0.122869	0.290536
BKL-GOLI-02	3	13	3.08724e-09	3.08523e-09	-1400	-5470	1830380000	3599683	0.00196663	2.21137e-07		0.00196114	-21.9752	0.112445	0.290536		BKL-GOLI-02	-22.2066	0.252847	3	0.9835	-22.9524
BKL-GOLI-02	3	14	3.0953e-09	3.07717e-09	-1375	-5395	1818100000	3574834	0.00196624	2.5023e-07		0.00196075	-22.1681	0.127263	0.290536
BKL-GOLI-02	3	15	3.07516e-09	3.07919e-09	-1275	-5345	1833215000	3603415	0.00196562	2.54896e-07		0.00196013	-22.4765	0.129677	0.290536
BKL-GG-01	3	16	3.08321e-09	3.07314e-09	3400	4130	1831407000	3604621	0.00196822	2.39644e-07	1.00273	0.00196272	-21.184	0.121756	0.290536
BKL-GG-01	3	17	3.07516e-09	3.0812e-09	3400	4230	1821907000	3586898	0.00196876	2.70795e-07	1.003	0.00196349	-20.7986	0.137546	0.290536
BKL-KAV-02	3	18	3.08724e-09	3.07113e-09	-900	-970	1824742000	3599595	0.00197266	1.92728e-07		0.00196738	-18.8599	0.0976996	0.290536		BKL-KAV-02	-18.2536	0.556628	3	0.992	-19.1613
BKL-KAV-02	3	19	3.09127e-09	3.08724e-09	-850	-995	1820525000	3593930	0.00197412	1.25606e-07		0.00196884	-18.1352	0.0636266	0.290536
BKL-KAV-02	3	20	3.09127e-09	3.0812e-09	-850	-1070	1836484000	3626798	0.00197486	1.912e-07		0.00196958	-17.7657	0.096817	0.290536
BKL-GG-01	3	21	3.10134e-09	3.08523e-09	3400	4330	1825832000	3593940	0.00196838	2.20583e-07	1.00281	0.00196312	-20.9861	0.112063	0.290536
BKL-GG-01	3	22	3.08523e-09	3.0671e-09	3400	4430	1835955000	3611602	0.00196715	1.48091e-07	1.00218	0.00196161	-21.7368	0.0752818	0.290536
BKL-KHOKH-01	3	23	3.0953e-09	3.08925e-09	-1425	3030	1927251000	3903573	0.00202546	1.80009e-07		0.00201976	7.26018	0.088873	0.290536		BKL-KHOKH-01	7.33627	0.288355	3	0.991	6.44763
BKL-KHOKH-01	3	24	3.08321e-09	3.08523e-09	-1300	3030	1922508000	3893321	0.00202513	1.61634e-07		0.00201942	7.09359	0.0798141	0.290536
BKL-KHOKH-01	3	25	3.10939e-09	3.08724e-09	-1300	2905	1914426000	3879116	0.00202625	2.54724e-07		0.00202055	7.65504	0.125712	0.290536
BKL-GG-01	3	26	3.09932e-09	3.07919e-09	3550	4530	1826085000	3595234	0.00196882	1.77624e-07	1.00303	0.00196328	-20.9068	0.0902187	0.290536
BKL-GG-01	3	27	3.08724e-09	3.09731e-09	3500	4480	1824516000	3592971	0.00196927	3.02575e-07	1.00326	0.00196306	-21.0165	0.153648	0.290536
BKL-GG-08	3	28	3.10738e-09	3.07717e-09	-400	6555	1956333000	3960245	0.00202432	1.20473e-07		0.00201793	6.34944	0.059513	0.290536		BKL-GG-08	6.21174	0.132144	3	0.9535	6.0371
BKL-GG-08	3	29	3.0953e-09	3.08724e-09	-225	6630	1906924000	3859652	0.00202402	2.18682e-07		0.00201763	6.19981	0.108043	0.290536
BKL-GG-08	3	30	3.08523e-09	3.10335e-09	-100	6630	1940190000	3926538	0.00202379	8.43057e-08		0.0020174	6.08596	0.0416573	0.290536
BKL-GG-01	3	31	3.09731e-09	3.08925e-09	3500	4380	1816139000	3576542	0.00196931	2.10105e-07	1.00328	0.00196309	-20.9981	0.10669	0.290536
BKL-GG-01	3	32	3.08523e-09	3.08724e-09	3500	4280	1813906000	3571429	0.00196892	1.62477e-07	1.00308	0.00196255	-21.2715	0.0825211	0.290536
BKL-BALD-04	3	33	3.08724e-09	3.07717e-09	-4200	4530	1932658000	3911004	0.00202364	1.51217e-07		0.00201709	5.9312	0.074725	0.290536		BKL-BALD-04	6.02747	0.0896863	3	0.9875	5.20547
BKL-BALD-04	3	34	3.07717e-09	3.07717e-09	-4200	4430	1923555000	3893271	0.002024	1.72785e-07		0.00201745	6.10866	0.0853682	0.290536
BKL-BALD-04	3	35	3.08523e-09	3.0812e-09	-4200	4330	1924887000	3895708	0.00202386	2.15214e-07		0.00201732	6.04255	0.106338	0.290536
BKL-GG-01	3	36	3.09731e-09	3.08321e-09	3600	4280	1800294000	3545894	0.00196962	2.53722e-07	1.00344	0.00196325	-20.9216	0.128818	0.290536
BKL-GG-01	3	37	3.08523e-09	3.08724e-09	3600	4380	1795456000	3535431	0.0019691	2.51452e-07	1.00318	0.00196289	-21.0984	0.127699	0.290536
BKL-BALD-03	3	38	3.09932e-09	3.07919e-09	-5400	30	1844769000	3734264	0.00202425	2.23036e-07		0.00201787	6.3169	0.110182	0.290536		BKL-BALD-03	6.21764	0.145646	3	0.989	5.36708
BKL-BALD-03	3	39	3.09932e-09	3.0953e-09	-5450	-20	1851370000	3746634	0.00202371	2.17365e-07		0.00201733	6.05044	0.107409	0.290536
BKL-BALD-03	3	40	3.09127e-09	3.08724e-09	-5400	-70	1828216000	3700643	0.00202418	2.34194e-07		0.0020178	6.28558	0.115698	0.290536
BKL-GG-01	3	41	3.07717e-09	3.07919e-09	3600	4480	1794803000	3534615	0.00196936	2.7345e-07	1.00331	0.00196316	-20.9677	0.138852	0.290536
BKL-GG-01	3	42	3.0953e-09	3.08925e-09	3700	4480	1784240000	3511742	0.0019682	1.9278e-07	1.00272	0.00196177	-21.6569	0.0979475	0.290536
BKL-KHAM-06	3	43	3.09328e-09	3.08523e-09	-4650	-2670	1877822000	3812038	0.00203003	8.12301e-08		0.0020234	9.07824	0.0400142	0.290536		BKL-KHAM-06	9.15943	0.0717741	3	1	8.09943
BKL-KHAM-06	3	44	3.09127e-09	3.09328e-09	-4600	-2720	1861334000	3778972	0.00203025	1.81205e-07		0.00202362	9.18561	0.0892524	0.290536
BKL-KHAM-06	3	45	3.09932e-09	3.08724e-09	-4550	-2670	1861812000	3780048	0.00203031	1.80177e-07		0.00202368	9.21444	0.0887437	0.290536
BKL-GG-01	3	46	3.09731e-09	3.08925e-09	3700	4580	1777345000	3500121	0.0019693	2.50018e-07	1.00328	0.00196287	-21.1111	0.126958	0.290536
BKL-GG-01	3	47	3.08724e-09	3.07919e-09	3800	4580	1781323000	3509786	0.00197032	2.42641e-07	1.0038	0.00196389	-20.6021	0.123148	0.290536
BKL-OSP-04	4	1	6.07379e-09	6.08789e-09	-5698	3930	3904104000	7889122	0.00202072	5.78721e-07		0.00201768	6.22186	0.286393	0.411892		BKL-OSP-04	6.95491	0.903108	13	0.998	5.93299
BKL-OSP-04	4	2	6.06976e-09	6.08386e-09	-5748	3980	3882459000	7842025	0.00201985	5.01281e-07		0.00201681	5.78913	0.248177	0.411892
BKL-OSP-04	4	3	6.05566e-09	6.07983e-09	-5798	3930	3912850000	7906073	0.00202053	5.12421e-07		0.00201749	6.12774	0.253607	0.411892
BKL-OSP-04	4	4	6.0758e-09	6.0899e-09	-5798	3830	3917386000	7915074	0.00202049	4.92278e-07		0.00201745	6.10683	0.243643	0.411892
BKL-OSP-04	4	5	6.06573e-09	6.0899e-09	-5873	3905	3838256000	7756244	0.00202076	5.56536e-07		0.00201772	6.24227	0.275409	0.411892
BKL-OSP-06	4	6	5.95698e-09	6.03552e-09	-773	4300	3897200000	7874996	0.00202068	5.19547e-07		0.00201763	6.20044	0.257115	0.411892		BKL-OSP-06	6.13289	0.111027	3	0.98	5.45369
BKL-OSP-06	4	7	6.00733e-09	6.02948e-09	-1123	3925	3931229000	7942189	0.00202028	5.61624e-07		0.00201724	6.00475	0.277993	0.411892
BKL-OSP-06	4	8	6.06976e-09	6.05969e-09	-673	4235	3935790000	7952902	0.00202066	4.56347e-07		0.00201762	6.19347	0.22584	0.411892
BKL-OSP-04	4	9	6.03754e-09	6.06976e-09	-5873	3830	3879954000	7840956	0.00202088	5.0046e-07		0.00201784	6.30153	0.247644	0.411892
BKL-GG-01	4	10	6.0174e-09	6.05969e-09	2643	-2378	3828522000	7526675	0.00196597	5.22562e-07	1.00158	0.00196395	-20.5717	0.265803	0.411892
BKL-GG-01	4	11	6.0315e-09	6.06976e-09	2643	-2478	3841892000	7551838	0.00196568	4.93618e-07	1.00144	0.00196366	-20.7157	0.251118	0.411892
BKL-GG-06	4	12	6.02747e-09	6.05969e-09	2477	5335	4061575000	8201854	0.00201939	5.95946e-07		0.00201731	6.03916	0.295112	0.411892		BKL-GG-06	5.71019	0.292445	3	0.992	4.80251
BKL-GG-06	4	13	6.00733e-09	6.07781e-09	2777	5335	4041035000	8155887	0.00201826	5.5456e-07		0.00201619	5.47969	0.274771	0.411892
BKL-GG-06	4	14	6.06372e-09	6.06171e-09	2927	5085	3948415000	7969970	0.00201853	5.9682e-07		0.00201645	5.61171	0.295671	0.411892
BKL-OSP-04	4	15	6.01136e-09	6.05768e-09	-5748	3780	3858868000	7798084	0.00202082	4.26533e-07		0.00201874	6.75107	0.21107	0.411892
BKL-GG-01	4	16	6.01941e-09	6.06372e-09	2643	-2578	3856001000	7576949	0.00196498	5.71575e-07	1.00108	0.00196296	-21.0634	0.29088	0.411892
BKL-GG-01	4	17	6.07781e-09	6.06573e-09	2743	-2578	3800029000	7459118	0.00196291	5.1074e-07	1.00002	0.00196281	-21.1388	0.260196	0.411892
BKL-GG-07	4	18	6.03351e-09	6.04559e-09	4692	1817	3962814000	8001726	0.0020192	5.89103e-07		0.0020191	6.9319	0.291751	0.411892		BKL-GG-07	6.98294	0.0729954	3	0.9755	6.38942
BKL-GG-07	4	19	6.03955e-09	6.00733e-09	4292	1517	4058633000	8196238	0.00201946	5.66946e-07		0.00201937	7.06655	0.280741	0.411892
BKL-GG-07	4	20	6.01941e-09	6.06976e-09	4947	1562	3933943000	7943565	0.00201923	6.01092e-07		0.00201914	6.95036	0.297683	0.411892
BKL-OSP-04	4	21	6.0174e-09	6.03552e-09	-5773	3885	3837139000	7755007	0.00202103	5.57179e-07		0.00202094	7.84898	0.27569	0.411892
BKL-GG-01	4	22	6.00733e-09	6.03754e-09	2743	-2678	3877637000	7605362	0.00196138	6.45343e-07	0.999241	0.00196128	-21.9013	0.329026	0.411892
BKL-GG-01	4	23	6.02143e-09	6.0315e-09	2843	-2678	3781932000	7422321	0.00196257	4.93661e-07	0.999848	0.00196205	-21.5181	0.251539	0.411892
BKL-GG-10	4	24	6.04358e-09	6.04559e-09	1497	1562	3937432000	7952147	0.00201963	4.94621e-07		0.0020191	6.93099	0.244907	0.411892		BKL-GG-10	6.9501	0.0238708	3	1	5.8901
BKL-GG-10	4	25	6.0033e-09	6.05969e-09	1247	1612	3910267000	7897356	0.00201965	4.96652e-07		0.00201912	6.94246	0.24591	0.411892
BKL-GG-10	4	26	6.03955e-09	6.06775e-09	1147	1312	3917611000	7912462	0.00201972	5.30056e-07		0.00201919	6.97686	0.26244	0.411892
BKL-OSP-04	4	27	6.02545e-09	6.04962e-09	-5648	3960	3869178000	7817532	0.00202046	5.17329e-07		0.00201993	7.3463	0.256045	0.411892
BKL-GG-01	4	28	6.01539e-09	6.03552e-09	2843	-2778	3852896000	7570922	0.00196501	5.19641e-07	1.00109	0.0019645	-20.2991	0.264447	0.411892
BKL-GG-01	4	29	6.0315e-09	6.0315e-09	2843	-2878	3836951000	7537903	0.00196457	3.92785e-07	1.00087	0.00196334	-20.8756	0.199935	0.411892
BKL-GG-12	4	30	6.00532e-09	6.06372e-09	-3453	1412	3916445000	7908426	0.0020193	5.8767e-07		0.00201804	6.4019	0.291027	0.411892		BKL-GG-12	6.41104	0.18333	3	0.991	5.5224
BKL-GG-12	4	31	6.01539e-09	6.03351e-09	-3453	1012	3797935000	7667852	0.00201896	5.84643e-07		0.0020177	6.23244	0.289577	0.411892
BKL-GG-12	4	32	6.0174e-09	6.04358e-09	-3353	512	3935993000	7949455	0.00201969	5.19721e-07		0.00201843	6.59876	0.257327	0.411892
BKL-OSP-04	4	33	6.02143e-09	6.03351e-09	-5538	3900	3866932000	7815463	0.00202109	5.29962e-07		0.00201983	7.29801	0.262216	0.411892
BKL-GG-01	4	34	6.00733e-09	6.03955e-09	3143	-2478	3827048000	7516561	0.00196406	4.81578e-07	1.00061	0.00196284	-21.1258	0.245195	0.411892
BKL-GG-01	4	35	6.00934e-09	5.99927e-09	3243	-2478	3816173000	7490089	0.00196272	5.99949e-07	0.999926	0.00196233	-21.3782	0.305672	0.411892
BKL-GG-21	4	36	6.0033e-09	6.03754e-09	-7353	812	3838564000	7749748	0.00201892	5.17034e-07		0.00201852	6.64086	0.256095	0.411892		BKL-GG-21	6.53449	0.102686	3	1	5.47449
BKL-GG-21	4	37	6.00532e-09	6.00532e-09	-7153	712	3828535000	7728628	0.00201869	5.39343e-07		0.00201829	6.52668	0.267175	0.411892
BKL-GG-21	4	38	5.99726e-09	6.02143e-09	-6953	562	3828075000	7727001	0.0020185	5.31843e-07		0.00201811	6.43594	0.263484	0.411892
BKL-OSP-04	4	39	6.00129e-09	6.0174e-09	-5413	3900	3853891000	7795054	0.00202266	5.09191e-07		0.00202226	8.50814	0.251743	0.411892
BKL-GG-01	4	40	5.97914e-09	6.01337e-09	3243	-2378	3827880000	7511666	0.00196238	6.51425e-07	0.999753	0.00196199	-21.5473	0.331956	0.411892
BKL-GG-01	4	41	6.00733e-09	5.99323e-09	3143	-2378	3774199000	7411971	0.00196385	5.67763e-07	1.0005	0.00196334	-20.8754	0.289107	0.411892
BKL-GG-22	4	42	5.98316e-09	6.00934e-09	-5348	-2687	3830455000	7733446	0.00201893	4.53624e-07		0.00201841	6.58757	0.224685	0.411892		BKL-GG-22	6.62962	0.0847523	3	1	5.56962
BKL-GG-22	4	43	5.97511e-09	6.02344e-09	-4748	-2787	3884329000	7843309	0.00201921	5.13942e-07		0.00201869	6.72717	0.254526	0.411892
BKL-GG-22	4	44	5.98115e-09	5.99927e-09	-4248	-2687	3857190000	7787331	0.0020189	5.0818e-07		0.00201838	6.57411	0.251711	0.411892
BKL-OSP-04	4	45	5.97712e-09	5.99726e-09	-5448	3750	3866470000	7814846	0.00202118	4.79512e-07		0.00202066	7.70887	0.237243	0.411892
BKL-GG-01	4	46	5.96907e-09	5.98316e-09	3143	-2278	3779697000	7422028	0.00196366	5.15042e-07	1.0004	0.00196315	-20.9701	0.262287	0.411892
BKL-GG-01	4	47	5.92879e-09	5.96101e-09	3043	-2278	3735606000	7335250	0.0019636	4.38129e-07	1.00038	0.00196261	-21.2405	0.223125	0.411892
BKL-KHAI-02	4	48	5.93684e-09	5.95094e-09	-1248	-2187	3687936000	7277800	0.00197341	5.36608e-07		0.00197241	-16.3541	0.27192	0.411892		BKL-KHAI-02	-16.5243	0.24076	3	0.978	-17.1654
BKL-KHAI-02	4	49	5.92275e-09	5.94893e-09	-1048	-2087	3681954000	7262714	0.00197251	5.98065e-07		0.00197151	-16.7998	0.303199	0.411892
BKL-KHAI-02	4	50	5.93483e-09	5.95094e-09	-648	-1687	3669508000	7240965	0.00197328	5.03252e-07		0.00197228	-16.4189	0.255034	0.411892
BKL-OSP-04	4	51	5.92678e-09	5.95497e-09	-5373	3750	3825150000	7736669	0.00202259	4.73945e-07		0.00202157	8.16316	0.234325	0.411892
BKL-GG-01	4	52	5.91066e-09	5.92073e-09	2943	-2278	3753312000	7374227	0.00196477	5.41479e-07	1.00097	0.00196377	-20.6593	0.275594	0.411892
BKL-GG-01	4	53	5.92275e-09	5.94893e-09	2843	-2178	3731292000	7326065	0.00196341	5.45236e-07	1.00028	0.00196241	-21.3372	0.277698	0.411892
BKL-GG-01	4	54	5.85226e-09	5.91872e-09	1652	3739	3739969000	7342973	0.00196337	5.1816e-07	1.00026	0.00196321	-20.9384	0.263914	0.46858
BKL-GG-01	4	55	5.91066e-09	5.92476e-09	1652	3839	3763323000	7389169	0.00196346	5.25473e-07	1.0003	0.00196331	-20.8905	0.267626	0.46858
BKL-GG-01	4	56	5.91469e-09	5.92879e-09	1602	3789	3817068000	7489518	0.00196211	4.25427e-07	0.999614	0.00196196	-21.5662	0.216822	0.46858
BKL-GG-01	4	57	5.92678e-09	5.9308e-09	1602	3689	3828709000	7518275	0.00196365	6.09458e-07	1.0004	0.0019635	-20.7948	0.310369	0.46858
BKL-GG-01	4	58	5.90865e-09	5.91268e-09	1727	3689	3654626000	7174779	0.0019632	4.39668e-07	1.00017	0.00196304	-21.0241	0.223955	0.46858
BKL-GG-01	4	64	5.99927e-09	6.01337e-09	1604	3622	3843681000	7551250	0.00196457	5.1799e-07	1.00087	0.00196442	-20.337	0.263665	0.46858
BKL-GG-01	4	65	6.0033e-09	6.0174e-09	1579	3747	3812945000	7476342	0.00196076	5.22203e-07	0.998929	0.00196016	-22.4608	0.266326	0.46858
BKL-GG-01	4	71	5.96101e-09	5.98115e-09	1572	3906	3859087000	7581511	0.00196459	5.13166e-07	1.00088	0.00196399	-20.5529	0.261207	0.46858
BKL-GG-01	4	72	5.96303e-09	5.98316e-09	1672	3906	3842903000	7547269	0.00196395	4.89416e-07	1.00055	0.00196228	-21.4027	0.2492	0.46858
BKL-GG-01	4	78	5.96504e-09	5.97511e-09	1744	4131	3889913000	7642497	0.0019647	3.62112e-07	1.00093	0.00196303	-21.0285	0.18431	0.46858
BKL-GG-01	4	79	5.95296e-09	5.97108e-09	1844	4131	3929351000	7720696	0.00196488	5.625e-07	1.00103	0.00196292	-21.084	0.286277	0.46858
BKL-GG-01	4	85	5.81199e-09	5.7697e-09	1621	4077	3714180000	7297296	0.00196471	5.99424e-07	1.00094	0.00196275	-21.1696	0.305096	0.46858
BKL-GG-01	4	86	5.73143e-09	5.72136e-09	1896	4027	3508112000	6893457	0.00196501	4.16086e-07	1.00109	0.00196301	-21.0421	0.211748	0.46858
BKL-GG-01	4	90	5.57435e-09	5.59046e-09	1609	3159	3681744000	7232357	0.00196441	5.04714e-07	1.00079	0.00196241	-21.3375	0.256928	0.46858
BKL-GG-01	4	91	5.57435e-09	5.55824e-09	1659	3159	3589226000	7053965	0.00196533	5.17345e-07	1.00126	0.00196296	-21.065	0.263235	0.46858
BKL-GG-01	4	97	5.58442e-09	5.61463e-09	1759	3159	3625489000	7125925	0.00196552	4.64026e-07	1.00135	0.00196315	-20.9699	0.236083	0.46858
BKL-GG-01	4	98	5.58442e-09	5.59046e-09	1809	3159	3686406000	7246216	0.00196568	4.88247e-07	1.00143	0.00196257	-21.2617	0.248386	0.46858
BKL-GG-01	4	104	5.51796e-09	5.51595e-09	1609	3100	3658746000	7193510	0.00196613	4.66133e-07	1.00166	0.00196302	-21.0357	0.237081	0.46858
BKL-GG-01	4	105	5.49178e-09	5.35283e-09	1759	3100	3484598000	6852678	0.00196658	4.47622e-07	1.00189	0.00196177	-21.6596	0.227614	0.46858
BKL-GG-01	4	112	4.86346e-09	4.88159e-09	2052	3158	3075980000	6055762	0.00196876	3.96571e-07	1.003	0.00196395	-20.5736	0.201432	0.46858
BKL-GG-01	4	113	4.87554e-09	4.88763e-09	2082	3118	3060284000	6026346	0.00196924	3.84697e-07	1.00325	0.00196411	-20.4916	0.195353	0.46858
BKL-GG-01	4	119	4.78492e-09	4.80103e-09	1872	3402	2887494000	5680266	0.00196723	3.50209e-07	1.00222	0.0019621	-21.4949	0.178022	0.46858
BKL-GG-01	4	120	4.78089e-09	4.78895e-09	1772	3402	2917908000	5738667	0.00196675	4.84777e-07	1.00198	0.00196162	-21.7331	0.246487	0.46858
BKL-GG-01	4	121	5.72338e-09	5.75963e-09	880	4252	3610799000	7088804	0.00196324	5.47889e-07	1.00019	0.001961	-22.0406	0.279073	0.457998
BKL-GG-01	4	122	5.7556e-09	5.6972e-09	930	4202	3587112000	7040651	0.00196278	4.69325e-07	0.999956	0.00196054	-22.2718	0.239113	0.457998
BKL-GG-01	4	123	5.71129e-09	5.6972e-09	1230	4602	3590395000	7055846	0.00196524	5.82805e-07	1.00121	0.001963	-21.0474	0.296557	0.457998
BKL-GG-01	4	124	5.68914e-09	5.67706e-09	1230	4652	3524521000	6930946	0.00196652	4.9654e-07	1.00186	0.00196428	-20.4073	0.252497	0.457998
BKL-GG-01	4	125	5.66296e-09	5.69317e-09	1280	4652	3550649000	6979812	0.00196582	5.01603e-07	1.00151	0.00196358	-20.756	0.255162	0.457998
BKL-ULANK-02	4	126	5.51192e-09	5.59248e-09	-2445	3752	3538677000	7144717	0.00201907	4.3432e-07		0.00201677	5.76972	0.215109	0.457998		BKL-ULANK-02	5.78935	0.116094	5	0.974	5.22439
BKL-ULANK-02	4	127	5.5663e-09	5.60657e-09	-2445	3652	3575574000	7220514	0.00201944	5.32467e-07		0.00201714	5.95354	0.26367	0.457998
BKL-ULANK-02	4	128	5.60255e-09	5.62268e-09	-2395	3802	3640333000	7349987	0.00201908	4.94235e-07		0.00201678	5.77471	0.244782	0.457998
BKL-ULANK-02	4	129	5.61262e-09	5.63275e-09	-2395	3902	3663213000	7396475	0.00201917	5.50022e-07		0.00201687	5.81904	0.2724	0.457998
BKL-ULANK-02	4	130	5.63678e-09	5.64081e-09	-2470	3902	3653441000	7375341	0.00201879	5.8028e-07		0.00201649	5.62975	0.287439	0.457998
BKL-GG-01	4	131	5.63678e-09	5.61664e-09	1230	4552	3540724000	6960833	0.00196598	5.42394e-07	1.00159	0.00196374	-20.6778	0.27589	0.457998
BKL-GG-01	4	132	5.60657e-09	5.64081e-09	1230	4502	3540851000	6961729	0.00196616	5.2452e-07	1.00168	0.00196374	-20.676	0.266774	0.457998
BKL-GG-01	4	138	5.80796e-09	5.80192e-09	1230	4452	3715621000	7299488	0.00196457	5.43586e-07	1.00087	0.00196215	-21.467	0.276694	0.457998
BKL-GG-01	4	139	5.78782e-09	5.76164e-09	1280	4452	3644199000	7158666	0.00196443	4.06794e-07	1.0008	0.00196187	-21.6067	0.20708	0.457998
BKL-BOR-01	4	140	5.73949e-09	5.68713e-09	-7196	165	3350414000	6765818	0.00201942	5.91455e-07		0.0020168	5.78437	0.292883	0.457998		BKL-BOR-01	5.74363	0.0515077	5	0.999	4.70267
BKL-BOR-01	4	141	5.68914e-09	5.65692e-09	-7296	165	3372531000	6810044	0.00201929	4.34825e-07		0.00201667	5.71764	0.215335	0.457998
BKL-BOR-01	4	142	5.64081e-09	5.61463e-09	-7296	65	3315506000	6694806	0.00201927	5.01738e-07		0.00201665	5.70867	0.248475	0.457998
BKL-BOR-01	4	143	5.59248e-09	5.59248e-09	-7646	-35	3417232000	6900133	0.00201924	4.73731e-07		0.00201662	5.69522	0.234608	0.457998
BKL-BOR-01	4	144	5.58442e-09	5.5663e-09	-7571	-435	3447738000	6962493	0.00201948	5.60458e-07		0.00201685	5.81227	0.277526	0.457998
BKL-GG-01	4	145	5.5522e-09	5.57637e-09	1330	4602	3496080000	6874627	0.00196642	4.85229e-07	1.00181	0.00196387	-20.6136	0.246757	0.457998
BKL-GG-01	4	146	5.58039e-09	5.60053e-09	1330	4652	3493948000	6869866	0.00196626	4.62021e-07	1.00173	0.00196242	-21.3321	0.234975	0.457998
BKL-KHAM-01	4	147	5.58644e-09	5.58241e-09	-3121	565	3490605000	7067820	0.00202486	4.70934e-07		0.00202091	7.83597	0.232576	0.457998		BKL-KHAM-01	7.73184	0.112902	5	1	6.67184
BKL-KHAM-01	4	148	5.5522e-09	5.54213e-09	-3121	665	3490025000	7065184	0.00202444	4.77381e-07		0.0020205	7.62792	0.235809	0.457998
BKL-KHAM-01	4	149	5.54213e-09	5.49178e-09	-3221	665	3433741000	6951768	0.00202459	5.03508e-07		0.00202065	7.70257	0.248696	0.457998
BKL-KHAM-01	4	150	5.48776e-09	5.46359e-09	-3221	765	3416636000	6916614	0.00202444	4.35631e-07		0.0020205	7.62792	0.215186	0.457998
BKL-KHAM-01	4	151	5.45956e-09	5.43942e-09	-3221	965	3396020000	6876500	0.00202492	4.7904e-07		0.00202097	7.86484	0.236573	0.457998
BKL-GG-01	4	152	5.42331e-09	5.38706e-09	1380	4652	3312772000	6515883	0.00196694	5.30737e-07	1.00208	0.00196311	-20.9897	0.269828	0.457998
BKL-GG-01	4	153	5.43942e-09	5.4354e-09	1430	4652	3341093000	6572336	0.00196717	4.57018e-07	1.00219	0.0019626	-21.2468	0.232323	0.457998
BKL-GG-01	4	159	5.27026e-09	5.20984e-09	1480	4627	3171919000	6240764	0.00196755	4.6239e-07	1.00239	0.00196298	-21.0568	0.235008	0.457998
BKL-GG-01	4	160	5.20179e-09	5.21186e-09	1330	4227	3144790000	6189108	0.00196809	3.84814e-07	1.00266	0.00196385	-20.6238	0.195527	0.457998
BKL-GG-01	4	166	5.37699e-09	5.41324e-09	1280	4177	3261868000	6415760	0.00196694	4.67214e-07	1.00208	0.0019627	-21.1936	0.237533	0.457998
BKL-GG-01	4	167	5.40921e-09	5.46158e-09	805	4152	3381405000	6647166	0.00196585	4.91238e-07	1.00152	0.00196219	-21.4506	0.249886	0.457998
BKL-GG-01	4	173	5.37699e-09	5.43338e-09	805	4102	3355008000	6598898	0.00196692	4.1402e-07	1.00207	0.00196326	-20.9145	0.210491	0.457998
BKL-GG-01	4	174	5.42935e-09	5.38706e-09	805	4052	3364880000	6616474	0.00196639	5.20434e-07	1.0018	0.00196204	-21.5242	0.264665	0.457998
BKL-GG-01	4	180	5.34276e-09	5.27429e-09	755	4052	3163507000	6225446	0.00196795	5.93508e-07	1.00259	0.0019636	-20.7465	0.301587	0.457998
BKL-GG-01	4	181	5.26019e-09	5.24408e-09	955	4002	3139212000	6176563	0.0019676	4.73909e-07	1.00241	0.0019628	-21.1464	0.240856	0.457998
BKL-GG-01	4	187	5.39109e-09	5.60053e-09	905	3927	3490255000	6867238	0.00196761	5.44946e-07	1.00242	0.0019628	-21.1439	0.276959	0.457998
BKL-GG-01	4	188	5.58845e-09	5.40519e-09	930	3852	3381136000	6652313	0.00196752	5.2079e-07	1.00237	0.00196271	-21.1877	0.264694	0.457998
BKL-GG-01	4	189	5.55019e-09	5.58442e-09	1872	4065	3541358000	6948743	0.00196216	5.07593e-07	0.999641	0.00196248	-21.3062	0.258691	0.157999
BKL-GG-01	4	190	5.59449e-09	5.62268e-09	1872	4015	3602353000	7070128	0.00196264	5.03116e-07	0.999884	0.00196295	-21.0688	0.256347	0.157999
BKL-GG-01	4	191	5.60255e-09	5.64081e-09	1872	3965	3592928000	7051929	0.00196272	4.63684e-07	0.999924	0.00196303	-21.0289	0.236246	0.157999
BKL-GG-01	4	192	5.63678e-09	5.64484e-09	1922	3965	3614672000	7095637	0.001963	5.19584e-07	1.00007	0.00196331	-20.8882	0.264689	0.157999
BKL-GG-01	4	193	5.64081e-09	5.65692e-09	1972	3965	3582439000	7028833	0.00196201	5.21646e-07	0.999566	0.00196233	-21.3795	0.265873	0.157999
BKL-BOR-02	4	194	5.55623e-09	5.62067e-09	-1140	3827	3698088000	7465123	0.00201864	5.78658e-07		0.00201896	6.86363	0.286658	0.157999		BKL-BOR-02	6.77967	0.102733	3	0.9895	5.91959
BKL-BOR-02	4	195	5.61866e-09	5.67102e-09	-1015	3752	3755003000	7578514	0.00201824	5.69462e-07		0.00201856	6.66511	0.282158	0.157999
BKL-BOR-02	4	196	5.65491e-09	5.69921e-09	-1315	4002	3779023000	7628113	0.00201853	5.93827e-07		0.00201886	6.81026	0.294188	0.157999
BKL-GG-01	4	197	5.69116e-09	5.70727e-09	1972	3915	3697781000	7257935	0.00196277	6.00237e-07	0.99995	0.00196308	-21.0034	0.305812	0.157999
BKL-AKZH-02	4	198	5.68914e-09	5.69116e-09	-3790	5002	3799699000	7671062	0.00201885	5.15344e-07		0.00201865	6.70507	0.255266	0.157999		BKL-AKZH-02	6.58689	0.133054	3	0.9795	5.91721
BKL-AKZH-02	4	199	5.67102e-09	5.68713e-09	-4115	4902	3742636000	7555151	0.00201867	5.34192e-07		0.00201846	6.61282	0.264626	0.157999
BKL-AKZH-02	4	200	5.67907e-09	5.66498e-09	-3990	3777	3817444000	7704858	0.00201833	5.62296e-07		0.00201812	6.44278	0.278595	0.157999
BKL-GG-01	4	201	5.67303e-09	5.64886e-09	1922	3915	3659573000	7185137	0.00196337	5.92579e-07	1.00026	0.00196316	-20.9631	0.301818	0.157999
BKL-AKZH-04	4	202	5.6388e-09	5.67303e-09	-5763	1086	3750492000	7571370	0.00201877	5.48369e-07		0.00201844	6.60108	0.271635	0.157999		BKL-AKZH-04	6.53061	0.0612336	3	0.9865	5.72765
BKL-AKZH-04	4	203	5.65491e-09	5.6972e-09	-6588	1161	3608787000	7284623	0.00201857	6.25311e-07		0.00201823	6.50036	0.309779	0.157999
BKL-AKZH-04	4	204	5.6831e-09	5.65692e-09	-6688	1531	3608304000	7283584	0.00201855	5.09652e-07		0.00201821	6.49039	0.252484	0.157999
BKL-GG-01	4	205	5.64484e-09	5.66498e-09	1872	3915	3625467000	7116893	0.00196302	4.8776e-07	1.00008	0.00196269	-21.1995	0.248475	0.157999
BKL-AKZH-05	4	206	5.65692e-09	5.66095e-09	-2348	31	3658161000	7392653	0.00202086	5.88312e-07		0.00202059	7.67738	0.29112	0.157999		BKL-AKZH-05	7.69782	0.0922184	3	1	6.63782
BKL-AKZH-05	4	207	5.66296e-09	5.69921e-09	-2348	-119	3652106000	7381270	0.0020211	5.74214e-07		0.00202084	7.79854	0.284109	0.157999
BKL-AKZH-05	4	208	5.75963e-09	5.71129e-09	-2348	181	3695636000	7467934	0.00202074	5.5172e-07		0.00202047	7.61754	0.273029	0.157999
BKL-GG-01	4	209	5.70928e-09	5.69116e-09	1822	3915	3657385000	7180315	0.00196323	4.96061e-07	1.00018	0.00196297	-21.0601	0.252676	0.157999
BKL-KHAM-03	4	210	5.69116e-09	5.71935e-09	-348	681	3661590000	7399960	0.00202096	5.51006e-07		0.00202084	7.79882	0.272646	0.157999		BKL-KHAM-03	7.7586	0.0537187	3	1	6.6986
BKL-KHAM-03	4	211	5.6972e-09	5.73143e-09	52	881	3672456000	7421781	0.00202092	6.00368e-07		0.0020208	7.77938	0.297076	0.157999
BKL-KHAM-03	4	212	5.73546e-09	5.73546e-09	-48	181	3706421000	7489805	0.00202076	5.38248e-07		0.00202064	7.69759	0.266359	0.157999
BKL-GG-01	4	213	5.7274e-09	5.74553e-09	1772	3915	3678134000	7219256	0.00196274	4.43846e-07	0.999938	0.00196262	-21.2334	0.226136	0.157999
BKL-KHAM-04	4	214	5.72338e-09	5.67303e-09	4252	181	3693845000	7467460	0.00202159	5.61676e-07		0.00202177	8.26459	0.277839	0.157999		BKL-KHAM-04	8.31047	0.0747741	3	0.983	7.57415
BKL-KHAM-04	4	215	5.65692e-09	5.59248e-09	4252	281	3670304000	7419910	0.0020216	4.77867e-07		0.00202178	8.27007	0.236381	0.157999
BKL-KHAM-04	4	216	5.55623e-09	5.51796e-09	4152	481	3570071000	7218200	0.00202185	5.28395e-07		0.00202204	8.39675	0.261342	0.157999
BKL-GG-01	4	217	5.50387e-09	5.45553e-09	1772	3865	3504492000	6878045	0.00196263	4.80403e-07	0.999879	0.00196281	-21.1412	0.244775	0.157999
BKL-KHAM-05	4	218	5.44345e-09	5.45755e-09	1848	-2143	3560099000	7195794	0.00202123	4.899e-07		0.00202121	7.9848	0.242377	0.157999		BKL-KHAM-05	7.87376	0.0964969	3	1	6.81376
BKL-KHAM-05	4	219	5.45151e-09	5.57234e-09	1648	-3043	3594977000	7265178	0.00202091	5.93431e-07		0.00202089	7.82621	0.293645	0.157999
BKL-KHAM-05	4	220	5.53206e-09	5.61866e-09	1848	-3243	3663610000	7403747	0.00202088	5.03046e-07		0.00202086	7.81026	0.248924	0.157999
BKL-GG-01	4	221	5.60053e-09	5.59046e-09	1822	3865	3650675000	7166837	0.00196314	5.07298e-07	1.00014	0.00196312	-20.9836	0.258411	0.157999
BKL-BALD-01	4	222	5.57838e-09	5.58039e-09	-1352	-2993	3592640000	7268736	0.00202323	5.89489e-07		0.00202351	9.12981	0.29136	0.157999		BKL-BALD-01	9.05582	0.183852	3	0.9915	8.15766
BKL-BALD-01	4	223	5.55623e-09	5.54012e-09	-1052	-1893	3606435000	7294601	0.00202266	5.13351e-07		0.00202294	8.8465	0.2538	0.157999
BKL-BALD-01	4	224	5.53609e-09	5.52199e-09	-752	-2093	3549854000	7182634	0.00202335	4.3798e-07		0.00202363	9.19116	0.216462	0.157999
BKL-GG-01	4	225	5.50789e-09	5.4938e-09	1872	3865	3543390000	6952304	0.00196205	5.10403e-07	0.999583	0.00196232	-21.3866	0.260138	0.157999
BKL-BALD-02	4	226	5.48171e-09	5.4797e-09	-4552	-2793	3543451000	7168248	0.00202295	5.43011e-07		0.00202364	9.19658	0.268425	0.157999		BKL-BALD-02	9.21321	0.0929155	3	0.9965	8.21985
BKL-BALD-02	4	227	5.4797e-09	5.47567e-09	-4552	-2543	3497090000	7073984	0.00202282	5.37948e-07		0.00202351	9.12973	0.26594	0.157999
BKL-BALD-02	4	228	5.46359e-09	5.45755e-09	-5352	-1643	3497818000	7076735	0.00202318	5.50723e-07		0.00202388	9.31331	0.272206	0.157999
BKL-GG-01	4	229	5.43741e-09	5.42935e-09	1872	3815	3544726000	6955981	0.00196235	5.39825e-07	0.999735	0.00196302	-21.0376	0.275092	0.157999
BKL-GG-01	4	230	5.20179e-09	5.2038e-09	1930	5374	3345235000	6566894	0.00196306	5.47892e-07	1.0001	0.00196308	-21.0046	0.279102	0.430422
BKL-GG-01	4	231	5.19575e-09	5.19776e-09	1930	5324	3361858000	6591289	0.00196061	5.76523e-07	0.998853	0.00196064	-22.2229	0.294052	0.430422
BKL-GG-01	4	232	5.18165e-09	5.16151e-09	1930	5274	3337346000	6550292	0.00196272	6.29211e-07	0.999928	0.00196275	-21.1712	0.320581	0.430422
BKL-GG-01	4	233	5.14943e-09	5.15346e-09	1880	5274	3278043000	6435256	0.00196314	5.13792e-07	1.00014	0.00196316	-20.9647	0.26172	0.430422
BKL-GG-01	4	234	5.14741e-09	5.1454e-09	1880	5324	3268085000	6415721	0.00196314	5.44017e-07	1.00014	0.00196317	-20.9612	0.277115	0.430422
BKL-OSP-03	4	235	5.19373e-09	5.26422e-09	-2070	4924	3381528000	6836819	0.00202184	6.47935e-07		0.00202186	8.30956	0.320469	0.430422		BKL-OSP-03	8.6427	0.606618	3	0.976	8.03966
BKL-OSP-03	4	236	5.25415e-09	5.32866e-09	-2020	4824	3344588000	6761927	0.00202177	6.58173e-07		0.00202179	8.27565	0.325543	0.430422
BKL-OSP-03	4	237	5.31859e-09	5.39713e-09	-2170	4724	3471583000	7026102	0.00202391	6.15294e-07		0.00202393	9.34288	0.304013	0.430422
BKL-GG-01	4	238	5.40116e-09	5.43942e-09	1980	5324	3579259000	7030911	0.00196437	6.13429e-07	1.00077	0.00196439	-20.3503	0.312278	0.430422
BKL-OSP-05	4	239	5.42734e-09	5.39311e-09	-5070	4924	3692563000	7469113	0.00202275	5.80936e-07		0.00202099	7.87479	0.2872	0.430422		BKL-OSP-05	7.96814	0.0808384	3	0.992	7.06046
BKL-OSP-05	4	240	5.40317e-09	5.4354e-09	-5195	4974	3734951000	7555898	0.00202304	5.28654e-07		0.00202127	8.0153	0.261317	0.430422
BKL-OSP-05	4	241	5.42331e-09	5.47366e-09	-5395	4924	3735390000	7556768	0.00202303	5.24958e-07		0.00202127	8.01431	0.25949	0.430422
BKL-GG-01	4	242	5.45755e-09	5.52401e-09	1980	5374	3625364000	7123007	0.00196479	4.76514e-07	1.00098	0.00196307	-21.0083	0.242527	0.430422
BKL-OSP-09	4	243	5.4938e-09	5.54616e-09	-6252	1748	3661560000	7410079	0.00202377	5.4499e-07		0.00202182	8.28655	0.269294	0.430422		BKL-OSP-09	8.29835	0.0322974	3	0.979	7.63819
BKL-OSP-09	4	244	5.51394e-09	5.64484e-09	-6552	1648	3788387000	7667096	0.00202387	4.94926e-07		0.00202191	8.33488	0.244544	0.430422
BKL-OSP-09	4	245	5.65893e-09	5.76164e-09	-6552	1348	3813223000	7716923	0.00202375	5.83431e-07		0.00202179	8.2736	0.288293	0.430422
BKL-GG-01	4	246	5.70525e-09	5.62671e-09	1930	5424	3828964000	7522888	0.00196474	5.70368e-07	1.00096	0.00196284	-21.1234	0.290302	0.430422
BKL-OSP-11	4	247	5.5965e-09	5.46963e-09	-3527	1498	3832776000	7748215	0.00202156	5.44661e-07		0.00201984	7.30289	0.269426	0.430422		BKL-OSP-11	7.28047	0.112064	3	1	6.22047
BKL-OSP-11	4	248	5.44547e-09	5.27227e-09	-3627	1473	3689316000	7457117	0.00202127	5.67056e-07		0.00201956	7.15889	0.280544	0.430422
BKL-OSP-11	4	249	5.28033e-09	5.28838e-09	-3777	1448	3614710000	7307905	0.00202172	5.12618e-07		0.00202	7.37962	0.253556	0.430422
BKL-GG-01	4	250	5.26825e-09	5.28637e-09	1930	4924	3535274000	6944425	0.00196433	5.12531e-07	1.00075	0.00196266	-21.2156	0.260919	0.430422
BKL-GG-23	4	251	5.2622e-09	5.18568e-09	3568	1448	3498328000	7063885	0.00201922	5.83655e-07		0.00201747	6.12111	0.28905	0.430422		BKL-GG-23	6.11048	0.19106	3	0.9885	5.26944
BKL-GG-23	4	252	5.17762e-09	5.09304e-09	3468	1248	3414686000	6893568	0.0020188	4.72949e-07		0.00201706	5.91433	0.234272	0.430422
BKL-GG-23	4	253	5.10714e-09	5.09103e-09	3518	1173	3371291000	6808523	0.00201957	5.4807e-07		0.00201782	6.296	0.27138	0.430422
BKL-GG-01	4	254	5.0729e-09	5.07693e-09	1880	4924	3326773000	6536405	0.0019648	5.26731e-07	1.00098	0.0019631	-20.9964	0.268085	0.430422
BKL-AKZH-03	4	255	5.0588e-09	5.04672e-09	-593	-2062	3338302000	6743738	0.00202011	5.56336e-07		0.00201794	6.35394	0.275398	0.430422		BKL-AKZH-03	6.07463	0.254216	3	1	5.01463
BKL-AKZH-03	4	256	5.03665e-09	5.04874e-09	-363	-2012	3421650000	6909764	0.00201943	5.15842e-07		0.00201726	6.01319	0.255439	0.430422
BKL-AKZH-03	4	257	5.0588e-09	5.09103e-09	-633	-2372	3447988000	6961880	0.00201912	5.42715e-07		0.00201694	5.85677	0.268788	0.430422
BKL-GG-01	4	258	5.09707e-09	5.10512e-09	1805	4799	3400955000	6683385	0.00196517	4.46605e-07	1.00117	0.00196305	-21.0203	0.227261	0.430422
BKL-AKZH-06	4	259	5.1011e-09	5.1313e-09	-4098	-1622	3301631000	6670872	0.00202049	6.16509e-07		0.00201884	6.80415	0.305129	0.430422		BKL-AKZH-06	6.94119	0.153853	3	0.961	6.62375
BKL-AKZH-06	4	260	5.1313e-09	5.18165e-09	-4273	-1672	3266589000	6602070	0.0020211	5.7531e-07		0.00201945	7.10762	0.284652	0.430422
BKL-AKZH-06	4	261	5.19776e-09	5.14339e-09	-4223	-1772	3221605000	6509899	0.0020207	6.88145e-07		0.00201906	6.91179	0.340547	0.430422
BKL-GG-01	4	262	5.13936e-09	5.18568e-09	1755	4874	3406304000	6689145	0.00196376	5.09581e-07	1.00046	0.00196216	-21.4623	0.259493	0.430422
BKL-GG-01	5	1	3.75987e-09	3.62091e-09	543	3473	1672369000	3289368	0.00196689	1.06942e-07	1.00205	0.0019626	-21.2434	0.054371	0.424453
BKL-GG-01	5	2	3.62695e-09	3.55043e-09	643	3473	1609109000	3166143	0.00196764	2.24822e-07	1.00243	0.00196335	-20.8716	0.11426	0.424453
BKL-GG-01	5	3	3.54036e-09	3.49001e-09	743	3473	1567504000	3084241	0.00196762	2.93851e-07	1.00242	0.00196333	-20.8826	0.149344	0.424453
BKL-GG-01	5	4	3.50411e-09	3.45578e-09	843	3473	1538760000	3025006	0.00196587	2.99784e-07	1.00153	0.00196159	-21.7499	0.152494	0.424453
BKL-GG-01	5	11	3.47591e-09	3.47994e-09	943	3473	1547339000	3044897	0.00196783	2.71481e-07	1.00253	0.00196354	-20.7776	0.13796	0.424453
BKL-GG-01	5	12	3.47994e-09	3.52223e-09	543	3373	1568931000	3086557	0.0019673	2.34553e-07	1.00226	0.00196245	-21.3179	0.119226	0.424453
BKL-GG-01	5	19	3.76591e-09	3.83639e-09	643	3373	1729431000	3404612	0.00196864	1.87334e-07	1.00294	0.00196379	-20.6533	0.0951593	0.424453
BKL-GG-01	5	20	3.83438e-09	3.83639e-09	743	3373	1741352000	3425387	0.00196709	1.8365e-07	1.00215	0.0019624	-21.3468	0.0933615	0.424453
BKL-GG-01	5	27	3.65313e-09	3.64508e-09	843	3373	1643832000	3232331	0.00196634	2.40461e-07	1.00177	0.00196165	-21.7204	0.122289	0.424453
BKL-GG-01	5	28	3.63904e-09	3.58063e-09	943	3373	1612090000	3172873	0.00196818	2.29567e-07	1.00271	0.00196355	-20.7696	0.11664	0.424453
BKL-GG-01	5	35	2.98655e-09	2.9503e-09	943	3273	1310647000	2578757	0.00196754	2.46822e-07	1.00238	0.00196292	-21.084	0.125447	0.424453
BKL-GG-01	5	36	2.96641e-09	2.93217e-09	943	3173	1305485000	2569051	0.00196789	2.04605e-07	1.00256	0.00196328	-20.9074	0.103972	0.424453
BKL-GG-01	5	43	2.91405e-09	2.91002e-09	1243	3073	1295748000	2551218	0.00196891	1.79917e-07	1.00308	0.0019643	-20.3989	0.0913789	0.424453
BKL-GG-01	5	44	2.92009e-09	2.89995e-09	1343	3073	1318497000	2585927	0.00196127	2.56364e-07	0.999188	0.00195667	-24.2011	0.130713	0.424453
BKL-GG-01	5	45	2.89995e-09	2.83148e-09	1343	2973	1278310000	2512985	0.00196586	2.18513e-07	1.00153	0.00196125	-21.9159	0.111153	0.424453
BKL-GG-01	5	46	2.87377e-09	2.85162e-09	1343	2873	1268778000	2495915	0.00196718	3.48949e-07	1.0022	0.00196257	-21.2606	0.177385	0.424453
BKL-GG-01	5	47	2.63614e-09	2.63815e-09	2043	5623	1176621000	2312292	0.0019652	2.58002e-07	1.00119	0.00196177	-21.6609	0.131286	0.424453
BKL-GG-01	5	48	2.63009e-09	2.63412e-09	2093	5623	1158394000	2278231	0.00196672	2.83582e-07	1.00196	0.00196328	-20.9047	0.14419	0.424453
BKL-GG-01	5	49	2.65426e-09	2.64218e-09	2143	5623	1148814000	2258405	0.00196585	2.96459e-07	1.00152	0.00196242	-21.3353	0.150804	0.424453
BKL-GG-01	5	50	2.64218e-09	2.63815e-09	2193	5623	1143021000	2248165	0.00196687	2.45806e-07	1.00204	0.00196343	-20.831	0.124973	0.424453
BKL-GG-01	5	56	2.51933e-09	2.53142e-09	2143	5523	1109034000	2180381	0.00196602	3.02125e-07	1.00161	0.00196258	-21.2542	0.153674	0.424453
BKL-GG-01	5	57	2.52537e-09	2.55357e-09	2143	5573	1118615000	2200490	0.00196715	4.48454e-07	1.00218	0.00196368	-20.7069	0.227971	0.424453
BKL-GG-01	5	59	2.54954e-09	2.55357e-09	2243	5473	1102530000	2168600	0.00196693	3.09342e-07	1.00207	0.00196345	-20.8194	0.157272	0.424453
BKL-GG-01	5	60	2.55558e-09	2.55961e-09	2293	5523	1103263000	2168194	0.00196526	2.70361e-07	1.00122	0.00196178	-21.6512	0.13757	0.424453
* corrected for IMF using primary reference only
† corrected for IMF including matrix effect (these are numbers presented in Table 2)
BKL-GG-01 primary reference for all sessions except session 2 where BKL-KAV-01 was used
mising sequence numbers are from archaeological samples (not included here)
